# Supplementary material for: Genome sequencing analysis of blood cells identifies germline haplotypes strongly associated with drug resistance in osteosarcoma patients
Source: BMC Cancer. 2019 Apr 16;19:357. doi: 10.1186/s12885-019-5474-y (PMC6466653; doi:10.1186/s12885-019-5474-y)
Supplement: Supplementary file 4 — Details of the 281 variants significantly associated with tumor necrosis. (XLSX 114 kb) [file 12885_2019_5474_MOESM4_ESM.xlsx]

## Sheet: 2016NovDec12_2016Dec12_85_15_GL
281 DMET variants significantly associated with tumor necrosis outcome
VariantName	Coeff of intercept	coeff of variant	coeff of dataset variable TARGET	rank	Degree of freedom - null	Degree of freedom - residual	Null deviance	Residual deviance	AIC	Pvalue from ANOVA	Number of GoodResponders without mutation	Number of GoodResponders with mutation	Number of PoorResponders without mutation	Number of PoorResponders with mutation	Adjusted P value	Gene Name	Location	Type	Snpeff Annotation
chr17_26803944_G_T	1.38629	-18.7897	-0.934309	3	50	48	69.1044	58.1219	64.1219	0.000930978	16	5	30	0	0.660616	SLC13A2;SLC13A2;SLC13A2	intron_variant;intron_variant;intron_variant	protein_coding;protein_coding;pseudogene	ANN=T|intron_variant|MODIFIER|SLC13A2|SLC13A2|transcript|NM_001145975.1|protein_coding|1/11|c.102+3112G>T||||||,T|intron_variant|MODIFIER|SLC13A2|SLC13A2|transcript|NM_003984.3|protein_coding|1/11|c.102+3112G>T||||||,T|intron_variant|MODIFIER|SLC13A2|SLC13A2|transcript|NR_027384.1|pseudogene|1/12|n.169+3112G>T||||||
chr1_97613809_TG_GG,*	17.5661	-18.6647	-17.1831	3	50	48	69.1044	58.9579	64.9579	0.00146346	15	6	28	2	0.660616	DPYD;DPYD-AS1	intron_variant;intron_variant	protein_coding;pseudogene	ANN=GG|intron_variant|MODIFIER|DPYD|DPYD|transcript|NM_000110.3|protein_coding|20/22|c.2622+44816A>C||||||,GG|intron_variant|MODIFIER|DPYD-AS1|DPYD-AS1|transcript|NR_046590.1|pseudogene|1/4|n.64+52267T>G||||||
chr4_88290659_C_T	0.980829	-18.3753	-0.454736	3	50	48	69.1044	59.0708	65.0708	0.0015559	16	5	30	0	0.660616	HSD17B11	intron_variant	protein_coding	ANN=T|intron_variant|MODIFIER|HSD17B11|HSD17B11|transcript|NM_016245.4|protein_coding|4/6|c.557+3202G>A||||||
chr9_86958098_CA_CAA,C	0.980829	-18.3753	-0.454736	3	50	48	69.1044	59.0708	65.0708	0.0015559	16	5	30	0	0.660616	SLC28A3;SLC28A3;SLC28A3;SLC28A3;SLC28A3;SLC28A3	upstream_gene_variant;upstream_gene_variant;upstream_gene_variant;upstream_gene_variant;intron_variant;intron_variant	protein_coding;protein_coding;pseudogene;pseudogene;protein_coding;protein_coding	ANN=C|upstream_gene_variant|MODIFIER|SLC28A3|SLC28A3|transcript|NM_001199633.1|protein_coding||c.-2551delT|||||2405|,CAA|upstream_gene_variant|MODIFIER|SLC28A3|SLC28A3|transcript|NM_001199633.1|protein_coding||c.-2552dupT|||||2406|,C|upstream_gene_variant|MODIFIER|SLC28A3|SLC28A3|transcript|NR_037638.2|pseudogene||n.-2405delT|||||2405|,CAA|upstream_gene_variant|MODIFIER|SLC28A3|SLC28A3|transcript…
chr4_69528597_A_G	0.287682	18.6351	-0.356675	3	50	48	69.1044	59.2895	65.2895	0.00175225	21	0	22	8	0.660616	UGT2B15	intron_variant	protein_coding	ANN=G|intron_variant|MODIFIER|UGT2B15|UGT2B15|transcript|NM_001076.3|protein_coding|3/5|c.1005+129T>C||||||
chr2_201532174_A_C	1.38629	-18.9524	-1.0033	3	50	48	69.1044	59.9686	65.9686	0.00253747	17	4	30	0	0.660616	AOX1	intron_variant	protein_coding	ANN=C|intron_variant|MODIFIER|AOX1|AOX1|transcript|NM_001159.3|protein_coding|32/34|c.3609+699A>C||||||
chr2_201532181_G_C	1.38629	-18.9524	-1.0033	3	50	48	69.1044	59.9686	65.9686	0.00253747	17	4	30	0	0.660616	AOX1	intron_variant	protein_coding	ANN=C|intron_variant|MODIFIER|AOX1|AOX1|transcript|NM_001159.3|protein_coding|32/34|c.3609+706G>C||||||
chr21_43664085_C_A	1.38629	-18.9524	-1.0033	3	50	48	69.1044	59.9686	65.9686	0.00253747	17	4	30	0	0.660616	ABCG1;ABCG1;ABCG1;ABCG1;ABCG1;ABCG1	intron_variant;intron_variant;intron_variant;intron_variant;intron_variant;intron_variant	protein_coding;protein_coding;protein_coding;protein_coding;protein_coding;protein_coding	ANN=A|intron_variant|MODIFIER|ABCG1|ABCG1|transcript|NM_004915.3|protein_coding|2/14|c.286+18061C>A||||||,A|intron_variant|MODIFIER|ABCG1|ABCG1|transcript|NM_207627.1|protein_coding|3/15|c.292+18061C>A||||||,A|intron_variant|MODIFIER|ABCG1|ABCG1|transcript|NM_207628.1|protein_coding|4/16|c.220+18061C>A||||||,A|intron_variant|MODIFIER|ABCG1|ABCG1|transcript|NM_207629.1|protein_coding|2/14|c.277+18…
chr21_43667134_AC_A	1.38629	-18.9524	-1.0033	3	50	48	69.1044	59.9686	65.9686	0.00253747	17	4	30	0	0.660616	ABCG1;ABCG1;ABCG1;ABCG1;ABCG1;ABCG1	intron_variant;intron_variant;intron_variant;intron_variant;intron_variant;intron_variant	protein_coding;protein_coding;protein_coding;protein_coding;protein_coding;protein_coding	ANN=A|intron_variant|MODIFIER|ABCG1|ABCG1|transcript|NM_004915.3|protein_coding|2/14|c.286+21111delC||||||,A|intron_variant|MODIFIER|ABCG1|ABCG1|transcript|NM_207627.1|protein_coding|3/15|c.292+21111delC||||||,A|intron_variant|MODIFIER|ABCG1|ABCG1|transcript|NM_207628.1|protein_coding|4/16|c.220+21111delC||||||,A|intron_variant|MODIFIER|ABCG1|ABCG1|transcript|NM_207629.1|protein_coding|2/14|c.277…
chr21_43667961_G_A	1.38629	-18.9524	-1.0033	3	50	48	69.1044	59.9686	65.9686	0.00253747	17	4	30	0	0.660616	ABCG1;ABCG1;ABCG1;ABCG1;ABCG1;ABCG1	intron_variant;intron_variant;intron_variant;intron_variant;intron_variant;intron_variant	protein_coding;protein_coding;protein_coding;protein_coding;protein_coding;protein_coding	ANN=A|intron_variant|MODIFIER|ABCG1|ABCG1|transcript|NM_004915.3|protein_coding|2/14|c.286+21937G>A||||||,A|intron_variant|MODIFIER|ABCG1|ABCG1|transcript|NM_207627.1|protein_coding|3/15|c.292+21937G>A||||||,A|intron_variant|MODIFIER|ABCG1|ABCG1|transcript|NM_207628.1|protein_coding|4/16|c.220+21937G>A||||||,A|intron_variant|MODIFIER|ABCG1|ABCG1|transcript|NM_207629.1|protein_coding|2/14|c.277+21…
chr21_43670845_T_C	1.38629	-18.9524	-1.0033	3	50	48	69.1044	59.9686	65.9686	0.00253747	17	4	30	0	0.660616	ABCG1;ABCG1;ABCG1;ABCG1;ABCG1;ABCG1	intron_variant;intron_variant;intron_variant;intron_variant;intron_variant;intron_variant	protein_coding;protein_coding;protein_coding;protein_coding;protein_coding;protein_coding	ANN=C|intron_variant|MODIFIER|ABCG1|ABCG1|transcript|NM_004915.3|protein_coding|2/14|c.287-20335T>C||||||,C|intron_variant|MODIFIER|ABCG1|ABCG1|transcript|NM_207627.1|protein_coding|3/15|c.293-20335T>C||||||,C|intron_variant|MODIFIER|ABCG1|ABCG1|transcript|NM_207628.1|protein_coding|4/16|c.221-20335T>C||||||,C|intron_variant|MODIFIER|ABCG1|ABCG1|transcript|NM_207629.1|protein_coding|2/14|c.278-20…
chr4_89140917_A_T	1.38629	-18.9524	-1.0033	3	50	48	69.1044	59.9686	65.9686	0.00253747	17	4	30	0	0.660616	ABCG2	intron_variant	protein_coding	ANN=T|intron_variant|MODIFIER|ABCG2|ABCG2|transcript|NM_001257386.1|protein_coding|1/15|c.-20+11229T>A||||||
chr16_28605428_T_G	0.980829	-18.4231	-0.528844	3	50	48	69.1044	61.0048	67.0048	0.00448274	17	4	30	0	0.660616	SGF29;SULT1A2;SULT1A2	downstream_gene_variant;intron_variant;intron_variant	protein_coding;protein_coding;protein_coding	ANN=G|downstream_gene_variant|MODIFIER|SGF29|SGF29|transcript|NM_138414.2|protein_coding||c.*2401T>G|||||2317|,G|intron_variant|MODIFIER|SULT1A2|SULT1A2|transcript|NM_001054.3|protein_coding|4/7|c.373-539A>C||||||,G|intron_variant|MODIFIER|SULT1A2|SULT1A2|transcript|NM_177528.2|protein_coding|4/7|c.373-539A>C||||||
chr6_46567844_CTTTCT_C	0.980829	-18.4231	-0.528844	3	50	48	69.1044	61.0048	67.0048	0.00448274	17	4	30	0	0.660616	CYP39A1;CYP39A1;CYP39A1	intron_variant;intron_variant;intron_variant	protein_coding;protein_coding;protein_coding	ANN=C|intron_variant|MODIFIER|CYP39A1|CYP39A1|transcript|NM_016593.4|protein_coding|7/11|c.932-3992_932-3988delAGAAA||||||,C|intron_variant|MODIFIER|CYP39A1|CYP39A1|transcript|NM_001278738.1|protein_coding|7/11|c.872-3992_872-3988delAGAAA||||||,C|intron_variant|MODIFIER|CYP39A1|CYP39A1|transcript|NM_001278739.1|protein_coding|6/10|c.416-3992_416-3988delAGAAA||||||
chr14_24511866_G_A	0.287682	-18.2592	0.405465	3	50	48	69.1044	61.1314	67.1314	0.0048071	17	4	30	0	0.660616	DHRS4L1;DHRS4L1;DHRS4L1;DHRS4L1;DHRS4L1;DHRS4L1;DHRS4L1;DHRS4L1	intron_variant;intron_variant;intron_variant;intron_variant;intron_variant;intron_variant;intron_variant;intron_variant	protein_coding;pseudogene;pseudogene;pseudogene;pseudogene;pseudogene;pseudogene;pseudogene	ANN=A|intron_variant|MODIFIER|DHRS4L1|DHRS4L1|transcript|NM_001277864.1|protein_coding|2/4|c.147+4650G>A||||||,A|intron_variant|MODIFIER|DHRS4L1|DHRS4L1|transcript|NR_102687.1|pseudogene|1/3|n.454-6020G>A||||||,A|intron_variant|MODIFIER|DHRS4L1|DHRS4L1|transcript|NR_102688.1|pseudogene|2/4|n.631+4073G>A||||||,A|intron_variant|MODIFIER|DHRS4L1|DHRS4L1|transcript|NR_102689.1|pseudogene|2/4|n.395+40…
chr11_17446962_T_A	-0.405465	17.7552	0.693147	3	50	48	69.1044	61.2638	67.2638	0.00517233	21	0	24	6	0.660616	ABCC8;ABCC8	intron_variant;intron_variant	protein_coding;protein_coding	ANN=A|intron_variant|MODIFIER|ABCC8|ABCC8|transcript|NM_001287174.1|protein_coding|16/38|c.2222+1634A>T||||||,A|intron_variant|MODIFIER|ABCC8|ABCC8|transcript|NM_000352.4|protein_coding|16/38|c.2222+1634A>T||||||
chr6_32806461_A_G	1.94591	-3.55535	-1.56292	3	50	48	69.1044	61.3956	67.3956	0.00556394	16	5	29	1	0.660616	TAP2;TAP2;TAP2;PSMB8;PSMB8	5_prime_UTR_variant;5_prime_UTR_variant;5_prime_UTR_variant;downstream_gene_variant;downstream_gene_variant	protein_coding;protein_coding;protein_coding;protein_coding;protein_coding	ANN=G|5_prime_UTR_variant|MODIFIER|TAP2|TAP2.2|transcript|NM_000544.3.8|protein_coding|1/12|c.-36T>C|||||451|,G|5_prime_UTR_variant|MODIFIER|TAP2|TAP2.2|transcript|NM_018833.2.2|protein_coding|1/12|c.-36T>C|||||451|,G|5_prime_UTR_variant|MODIFIER|TAP2|TAP2.2|transcript|NM_001290043.1.8|protein_coding|1/12|c.-36T>C|||||451|,G|downstream_gene_variant|MODIFIER|PSMB8|PSMB8.3|transcript|NM_148919.3|pr…
chr19_49098912_G_T,*	17.5661	-18.2592	-17.1831	3	50	48	69.1044	61.4178	67.4178	0.00563281	15	6	27	3	0.660616	FAM83E;SULT2B1;SULT2B1	downstream_gene_variant;intron_variant;intron_variant	protein_coding;protein_coding;protein_coding	ANN=T|downstream_gene_variant|MODIFIER|FAM83E|FAM83E|transcript|NM_017708.3|protein_coding||c.*5454C>A|||||4945|,T|intron_variant|MODIFIER|SULT2B1|SULT2B1|transcript|NM_177973.1|protein_coding|5/6|c.646-1084G>T||||||,T|intron_variant|MODIFIER|SULT2B1|SULT2B1|transcript|NM_004605.2|protein_coding|4/5|c.601-1084G>T||||||
chr1_97567977_G_A	-0.693147	18.2592	1.07614	3	50	48	69.1044	61.4178	67.4178	0.00563281	21	0	25	5	0.660616	DPYD;DPYD-AS1	intron_variant;intron_variant	protein_coding;pseudogene	ANN=A|intron_variant|MODIFIER|DPYD|DPYD|transcript|NM_000110.3|protein_coding|20/22|c.2623-3789C>T||||||,A|intron_variant|MODIFIER|DPYD-AS1|DPYD-AS1|transcript|NR_046590.1|pseudogene|1/4|n.64+6435G>A||||||
chr20_52774601_A_G	-0.13418	1.74653	-0.201961	3	50	48	69.1044	61.4179	67.4179	0.00563309	17	4	13	17	0.660616	CYP24A1;CYP24A1	intron_variant;intron_variant	protein_coding;protein_coding	ANN=G|intron_variant|MODIFIER|CYP24A1|CYP24A1|transcript|NM_000782.4|protein_coding|9/11|c.1236+24T>C||||||,G|intron_variant|MODIFIER|CYP24A1|CYP24A1|transcript|NM_001128915.1|protein_coding|9/10|c.1236+24T>C||||||
chr21_43721660_C_T	0.693147	-18.1769	-0.167054	3	50	48	69.1044	61.4562	67.4562	0.00575383	17	4	30	0	0.660616	ABCG1;ABCG1;ABCG1;ABCG1;ABCG1;ABCG1;ABCG1-TFF3	downstream_gene_variant;downstream_gene_variant;downstream_gene_variant;downstream_gene_variant;downstream_gene_variant;downstream_gene_variant;intergenic_region	protein_coding;protein_coding;protein_coding;protein_coding;protein_coding;protein_coding;	ANN=T|downstream_gene_variant|MODIFIER|ABCG1|ABCG1|transcript|NM_004915.3|protein_coding||c.*5158C>T|||||4306|,T|downstream_gene_variant|MODIFIER|ABCG1|ABCG1|transcript|NM_207627.1|protein_coding||c.*5158C>T|||||4306|,T|downstream_gene_variant|MODIFIER|ABCG1|ABCG1|transcript|NM_207628.1|protein_coding||c.*5158C>T|||||4306|,T|downstream_gene_variant|MODIFIER|ABCG1|ABCG1|transcript|NM_207629.1|prot…
chr16_16101875_G_A	0.470004	-18.1387	0.136132	3	50	48	69.1044	61.4721	67.4721	0.00580503	17	4	30	0	0.660616	ABCC1	intron_variant	protein_coding	ANN=A|intron_variant|MODIFIER|ABCC1|ABCC1|transcript|NM_004996.3|protein_coding|2/30|c.225+26G>A||||||
chr14_77795439_A_G	0.470004	-18.1387	0.136132	3	50	48	69.1044	61.4721	67.4721	0.00580503	17	4	30	0	0.660616	GSTZ1;GSTZ1;GSTZ1	intron_variant;intron_variant;intron_variant	protein_coding;protein_coding;protein_coding	ANN=G|intron_variant|MODIFIER|GSTZ1|GSTZ1|transcript|NM_145870.2|protein_coding|5/8|c.343-27A>G||||||,G|intron_variant|MODIFIER|GSTZ1|GSTZ1|transcript|NM_001312660.1|protein_coding|6/9|c.178-27A>G||||||,G|intron_variant|MODIFIER|GSTZ1|GSTZ1|transcript|NM_145871.2|protein_coding|4/7|c.217-27A>G||||||
chr2_27438615_G_C	0.470004	-18.1387	0.136132	3	50	48	69.1044	61.4721	67.4721	0.00580503	17	4	30	0	0.660616	ATRAID;ATRAID;ATRAID;SLC5A6;CAD;SLC5A6;CAD	missense_variant;missense_variant;missense_variant;upstream_gene_variant;upstream_gene_variant;upstream_gene_variant;upstream_gene_variant	protein_coding;protein_coding;protein_coding;protein_coding;protein_coding;pseudogene;protein_coding	ANN=C|missense_variant|MODERATE|ATRAID|ATRAID|transcript|NM_080592.3|protein_coding|5/7|c.646G>C|p.Asp216His|819/1258|646/855|216/284||,C|missense_variant|MODERATE|ATRAID|ATRAID|transcript|NM_001170795.1|protein_coding|5/7|c.481G>C|p.Asp161His|499/938|481/690|161/229||,C|missense_variant|MODERATE|ATRAID|ATRAID|transcript|NM_016085.4|protein_coding|5/7|c.307G>C|p.Asp103His|639/1078|307/516|103/171…
chr6_160551093_T_G	-0.697418	2.1505	0.787253	3	50	48	69.1044	61.6606	67.6606	0.00644522	19	2	18	12	0.660616	SLC22A1;SLC22A1	intron_variant;intron_variant	protein_coding;protein_coding	ANN=G|intron_variant|MODIFIER|SLC22A1|SLC22A1|transcript|NM_003057.2|protein_coding|1/10|c.412-43T>G||||||,G|intron_variant|MODIFIER|SLC22A1|SLC22A1|transcript|NM_153187.1|protein_coding|1/9|c.412-43T>G||||||
chr11_17451427_C_A	-0.182322	17.5462	0.41871	3	50	48	69.1044	61.8205	67.8205	0.00704505	21	0	24	6	0.660616	ABCC8;ABCC8	intron_variant;intron_variant	protein_coding;protein_coding	ANN=A|intron_variant|MODIFIER|ABCC8|ABCC8|transcript|NM_001287174.1|protein_coding|12/38|c.1817+934G>T||||||,A|intron_variant|MODIFIER|ABCC8|ABCC8|transcript|NM_000352.4|protein_coding|12/38|c.1817+934G>T||||||
chr1_94476605_C_T	0.433879	-2.50832	0.324582	3	50	48	69.1044	61.974	67.974	0.00767421	15	6	29	1	0.660616	ABCA4	intron_variant	protein_coding	ANN=T|intron_variant|MODIFIER|ABCA4|ABCA4|transcript|NM_000350.2|protein_coding|39/49|c.5585-120G>A||||||
chr22_24323131_C_T	0.287682	17.5015	-0.223144	3	50	48	69.1044	62.0643	68.0643	0.00807083	21	0	24	6	0.660616	GSTT2;GSTT2B;GSTT2;GSTT2;GSTT2;GSTT2;DDT	splice_region_variant&intron_variant;splice_region_variant&intron_variant;splice_region_variant&intron_variant;splice_region_variant&intron_variant;splice_region_variant&intron_variant;splice_region_variant&intron_variant;upstream_gene_variant	protein_coding;protein_coding;protein_coding;pseudogene;pseudogene;pseudogene;protein_coding	ANN=T|splice_region_variant&intron_variant|LOW|GSTT2|GSTT2|transcript|NM_000854.4|protein_coding|1/4|c.113-8C>T||||||,T|splice_region_variant&intron_variant|LOW|GSTT2B|GSTT2B|transcript|NM_001080843.3|protein_coding|1/4|c.113-8C>T||||||,T|splice_region_variant&intron_variant|LOW|GSTT2|GSTT2|transcript|NM_001302670.1|protein_coding|1/4|c.113-8C>T||||||,T|splice_region_variant&intron_variant|LOW|GS…
chr22_24325062_G_A	0.287682	17.5015	-0.223144	3	50	48	69.1044	62.0643	68.0643	0.00807083	21	0	24	6	0.660616	GSTT2;GSTT2B;GSTT2;GSTT2;GSTT2;GSTT2;DDT	missense_variant&splice_region_variant;missense_variant&splice_region_variant;missense_variant&splice_region_variant;splice_region_variant&non_coding_exon_variant;splice_region_variant&non_coding_exon_variant;splice_region_variant&non_coding_exon_variant;upstream_gene_variant	protein_coding;protein_coding;protein_coding;pseudogene;pseudogene;pseudogene;protein_coding	ANN=A|missense_variant&splice_region_variant|MODERATE|GSTT2|GSTT2|transcript|NM_000854.4|protein_coding|4/5|c.352G>A|p.Val118Met|522/1214|352/735|118/244||,A|missense_variant&splice_region_variant|MODERATE|GSTT2B|GSTT2B|transcript|NM_001080843.3|protein_coding|4/5|c.352G>A|p.Val118Met|402/1094|352/735|118/244||,A|missense_variant&splice_region_variant|MODERATE|GSTT2|GSTT2|transcript|NM_001302670.…
chr11_64359274_C_T	-7.07952e-16	17.4457	0.182322	3	50	48	69.1044	62.1101	68.1101	0.00828025	21	0	24	6	0.660616	SLC22A12;SLC22A12;SLC22A12;SLC22A12	synonymous_variant;synonymous_variant;synonymous_variant;5_prime_UTR_variant	protein_coding;protein_coding;protein_coding;protein_coding	ANN=T|synonymous_variant|LOW|SLC22A12|SLC22A12|transcript|NM_144585.3|protein_coding|1/10|c.246C>T|p.Asn82Asn|993/3211|246/1662|82/553||,T|synonymous_variant|LOW|SLC22A12|SLC22A12|transcript|NM_001276326.1|protein_coding|1/10|c.246C>T|p.Asn82Asn|993/3109|246/1560|82/519||,T|synonymous_variant|LOW|SLC22A12|SLC22A12|transcript|NM_001276327.1|protein_coding|1/8|c.246C>T|p.Asn82Asn|993/2887|246/1338|…
chr4_106640184_C_A	-1.63487e-16	17.4457	0.182322	3	50	48	69.1044	62.1101	68.1101	0.00828025	21	0	24	6	0.660616	GSTCD;GSTCD	intron_variant;intron_variant	protein_coding;protein_coding	ANN=A|intron_variant|MODIFIER|GSTCD|GSTCD|transcript|NM_001031720.3|protein_coding|2/11|c.427-33C>A||||||,A|intron_variant|MODIFIER|GSTCD|GSTCD|transcript|NM_024751.3|protein_coding|2/11|c.166-33C>A||||||
chr1_226019653_G_A	-0.0757044	2.30325	0.104408	3	50	48	69.1044	62.13	68.13	0.0083728	20	1	20	10	0.660616	EPHX1;EPHX1;EPHX1	synonymous_variant;synonymous_variant;synonymous_variant	protein_coding;protein_coding;protein_coding	ANN=A|synonymous_variant|LOW|EPHX1|EPHX1|transcript|NM_000120.3|protein_coding|3/9|c.357G>A|p.Lys119Lys|606/1831|357/1368|119/455||,A|synonymous_variant|LOW|EPHX1|EPHX1|transcript|NM_001136018.3|protein_coding|3/9|c.357G>A|p.Lys119Lys|458/1683|357/1368|119/455||,A|synonymous_variant|LOW|EPHX1|EPHX1|transcript|NM_001291163.1|protein_coding|3/9|c.357G>A|p.Lys119Lys|844/2069|357/1368|119/455||
chr21_43714935_C_T	0.154151	17.4361	-0.0289875	3	50	48	69.1044	62.1812	68.1812	0.00861566	21	0	24	6	0.660616	ABCG1;ABCG1;ABCG1;ABCG1;ABCG1;ABCG1	intron_variant;intron_variant;intron_variant;intron_variant;intron_variant;intron_variant	protein_coding;protein_coding;protein_coding;protein_coding;protein_coding;protein_coding	ANN=T|intron_variant|MODIFIER|ABCG1|ABCG1|transcript|NM_004915.3|protein_coding|14/14|c.1808+165C>T||||||,T|intron_variant|MODIFIER|ABCG1|ABCG1|transcript|NM_207627.1|protein_coding|15/15|c.1778+165C>T||||||,T|intron_variant|MODIFIER|ABCG1|ABCG1|transcript|NM_207628.1|protein_coding|16/16|c.1706+165C>T||||||,T|intron_variant|MODIFIER|ABCG1|ABCG1|transcript|NM_207629.1|protein_coding|14/14|c.1763+…
chr19_41599323_A_G	0.593474	-2.45068	0.0907883	3	50	48	69.1044	62.1879	68.1879	0.00864837	15	6	29	1	0.660616	CYP2A13	intron_variant	protein_coding	ANN=G|intron_variant|MODIFIER|CYP2A13|CYP2A13|transcript|NM_000766.4|protein_coding|5/8|c.832-212A>G||||||
chr21_43716554_G_A	0.593474	-2.45068	0.0907883	3	50	48	69.1044	62.1879	68.1879	0.00864837	15	6	29	1	0.660616	ABCG1;ABCG1;ABCG1;ABCG1;ABCG1;ABCG1	3_prime_UTR_variant;3_prime_UTR_variant;3_prime_UTR_variant;3_prime_UTR_variant;3_prime_UTR_variant;3_prime_UTR_variant	protein_coding;protein_coding;protein_coding;protein_coding;protein_coding;protein_coding	ANN=A|3_prime_UTR_variant|MODIFIER|ABCG1|ABCG1|transcript|NM_004915.3|protein_coding|15/15|c.*52G>A|||||52|,A|3_prime_UTR_variant|MODIFIER|ABCG1|ABCG1|transcript|NM_207627.1|protein_coding|16/16|c.*52G>A|||||52|,A|3_prime_UTR_variant|MODIFIER|ABCG1|ABCG1|transcript|NM_207628.1|protein_coding|17/17|c.*52G>A|||||52|,A|3_prime_UTR_variant|MODIFIER|ABCG1|ABCG1|transcript|NM_207629.1|protein_coding|15…
chr7_95034775_G_C	-0.215433	1.58044	-0.106723	3	50	48	69.1044	62.3033	68.3033	0.00922548	16	5	12	18	0.660616	PON2;PON2	missense_variant;missense_variant	protein_coding;protein_coding	ANN=C|missense_variant|MODERATE|PON2|PON2|transcript|NM_000305.2|protein_coding|9/9|c.932C>G|p.Ser311Cys|1053/1654|932/1065|311/354||,C|missense_variant|MODERATE|PON2|PON2|transcript|NM_001018161.1|protein_coding|9/9|c.896C>G|p.Ser299Cys|1017/1618|896/1029|299/342||
chr22_46563779_CA_C	-0.405465	17.8304	0.741937	3	50	48	69.1044	62.3621	68.3621	0.00953467	21	0	25	5	0.660616	PPARA;PPARA	intron_variant;intron_variant	protein_coding;protein_coding	ANN=C|intron_variant|MODIFIER|PPARA|PPARA|transcript|NM_001001928.2|protein_coding|2/7|c.-43+15918delA||||||INFO_REALIGN_3_PRIME,C|intron_variant|MODIFIER|PPARA|PPARA|transcript|NM_005036.4|protein_coding|2/8|c.-126-8859delA||||||INFO_REALIGN_3_PRIME
chr4_89031974_A_T	-0.405465	17.8304	0.741937	3	50	48	69.1044	62.3621	68.3621	0.00953467	21	0	25	5	0.660616	ABCG2;ABCG2	intron_variant;intron_variant	protein_coding;protein_coding	ANN=T|intron_variant|MODIFIER|ABCG2|ABCG2|transcript|NM_004827.2|protein_coding|9/15|c.1194+2481T>A||||||,T|intron_variant|MODIFIER|ABCG2|ABCG2|transcript|NM_001257386.1|protein_coding|9/15|c.1194+2481T>A||||||
chr4_89031976_A_T	-0.405465	17.8304	0.741937	3	50	48	69.1044	62.3621	68.3621	0.00953467	21	0	25	5	0.660616	ABCG2;ABCG2	intron_variant;intron_variant	protein_coding;protein_coding	ANN=T|intron_variant|MODIFIER|ABCG2|ABCG2|transcript|NM_004827.2|protein_coding|9/15|c.1194+2479T>A||||||,T|intron_variant|MODIFIER|ABCG2|ABCG2|transcript|NM_001257386.1|protein_coding|9/15|c.1194+2479T>A||||||
chr9_107655702_CAAAAAAAAAAAAAAAAAAAAAAA_C	-0.405465	17.8304	0.741937	3	50	48	69.1044	62.3621	68.3621	0.00953467	21	0	25	5	0.660616	ABCA1	intron_variant	protein_coding	ANN=C|intron_variant|MODIFIER|ABCA1|ABCA1|transcript|NM_005502.3|protein_coding|2/49|c.67-4249_67-4227delTTTTTTTTTTTTTTTTTTTTTTT||||||
chr11_62761161_C_T	0.0819186	1.88417	-0.201359	3	50	48	69.1044	62.6591	68.6591	0.0112659	19	2	18	12	0.660616	SLC22A8;SLC22A8;SLC22A8;SLC22A8	intron_variant;intron_variant;intron_variant;intron_variant	protein_coding;protein_coding;protein_coding;protein_coding	ANN=T|intron_variant|MODIFIER|SLC22A8|SLC22A8|transcript|NM_001184732.1|protein_coding|9/10|c.1326-62G>A||||||,T|intron_variant|MODIFIER|SLC22A8|SLC22A8|transcript|NM_001184733.1|protein_coding|9/10|c.1053-62G>A||||||,T|intron_variant|MODIFIER|SLC22A8|SLC22A8|transcript|NM_001184736.1|protein_coding|8/9|c.957-62G>A||||||,T|intron_variant|MODIFIER|SLC22A8|SLC22A8|transcript|NM_004254.3|protein_cod…
chr14_23270658_T_A	-0.393921	2.3399	0.566225	3	50	48	69.1044	62.6905	68.6905	0.0114672	20	1	21	9	0.660616	SLC7A7;SLC7A7;SLC7A7	intron_variant;intron_variant;intron_variant	protein_coding;pseudogene;protein_coding	ANN=A|intron_variant|MODIFIER|SLC7A7|SLC7A7|transcript|NM_001126105.2|protein_coding|3/10|c.499+11451A>T||||||,A|intron_variant|MODIFIER|SLC7A7|SLC7A7|transcript|NR_040448.1|pseudogene|2/9|n.1114+11451A>T||||||,A|intron_variant|MODIFIER|SLC7A7|SLC7A7|transcript|NM_001126106.2|protein_coding|3/10|c.499+11451A>T||||||
chr14_23274088_C_T	-0.393921	2.3399	0.566225	3	50	48	69.1044	62.6905	68.6905	0.0114672	20	1	21	9	0.660616	SLC7A7;SLC7A7;SLC7A7	intron_variant;intron_variant;intron_variant	protein_coding;pseudogene;protein_coding	ANN=T|intron_variant|MODIFIER|SLC7A7|SLC7A7|transcript|NM_001126105.2|protein_coding|3/10|c.499+8021G>A||||||,T|intron_variant|MODIFIER|SLC7A7|SLC7A7|transcript|NR_040448.1|pseudogene|2/9|n.1114+8021G>A||||||,T|intron_variant|MODIFIER|SLC7A7|SLC7A7|transcript|NM_001126106.2|protein_coding|3/10|c.499+8021G>A||||||
chr19_49104206_G_A	-0.152486	1.84931	0.134778	3	50	48	69.1044	62.7095	68.7095	0.0115907	19	2	18	12	0.660616	FAM83E;SULT2B1;SULT2B1	3_prime_UTR_variant;downstream_gene_variant;downstream_gene_variant	protein_coding;protein_coding;protein_coding	ANN=A|3_prime_UTR_variant|MODIFIER|FAM83E|FAM83E|transcript|NM_017708.3|protein_coding|5/5|c.*160C>T|||||160|,A|downstream_gene_variant|MODIFIER|SULT2B1|SULT2B1|transcript|NM_177973.1|protein_coding||c.*1543G>A|||||1522|,A|downstream_gene_variant|MODIFIER|SULT2B1|SULT2B1|transcript|NM_004605.2|protein_coding||c.*1543G>A|||||1522|
chr21_43663555_CGCGTGT_CGT,*GT,C	1.91312	-2.5477	-1.41486	3	50	48	69.1044	62.7627	68.7627	0.0119435	14	7	27	3	0.660616	ABCG1;ABCG1;ABCG1;ABCG1;ABCG1;ABCG1;ABCG1;ABCG1;ABCG1;ABCG1;ABCG1;ABCG1;ABCG1;ABCG1;ABCG1;ABCG1;ABCG1;ABCG1	intron_variant;intron_variant;intron_variant;intron_variant;intron_variant;intron_variant;intron_variant;intron_variant;intron_variant;intron_variant;intron_variant;intron_variant;intron_variant;intron_variant;intron_variant;intron_variant;intron_variant;intron_variant	protein_coding;protein_coding;protein_coding;protein_coding;protein_coding;protein_coding;protein_coding;protein_coding;protein_coding;protein_coding;protein_coding;protein_coding;protein_coding;protein_coding;protein_coding;protein_coding;protein_coding;protein_coding	ANN=*GT|intron_variant|MODIFIER|ABCG1|ABCG1|transcript|NM_004915.3|protein_coding|2/14|c.286+17531_286+17535delCGCGTins*||||||INFO_REALIGN_3_PRIME,CGT|intron_variant|MODIFIER|ABCG1|ABCG1|transcript|NM_004915.3|protein_coding|2/14|c.286+17533_286+17536delCGTG||||||,C|intron_variant|MODIFIER|ABCG1|ABCG1|transcript|NM_004915.3|protein_coding|2/14|c.286+17533_286+17538delCGTGTG||||||INFO_REALIGN_3_PR…
chr10_135348673_C_A	1.30888	-2.80628	-0.866929	3	50	48	69.1044	62.8477	68.8477	0.01253	16	5	29	1	0.660616	CYP2E1	intron_variant	protein_coding	ANN=A|intron_variant|MODIFIER|CYP2E1|CYP2E1|transcript|NM_000773.3|protein_coding|6/8|c.967+1272C>A||||||
chr3_119524554_T_C,TC	1.30888	-2.80628	-0.866929	3	50	48	69.1044	62.8477	68.8477	0.01253	16	5	29	1	0.660616	NR1I2;NR1I2;NR1I2;NR1I2;NR1I2;NR1I2	intron_variant;intron_variant;intron_variant;intron_variant;intron_variant;intron_variant	protein_coding;protein_coding;protein_coding;protein_coding;protein_coding;protein_coding	ANN=C|intron_variant|MODIFIER|NR1I2|NR1I2|transcript|NM_022002.2|protein_coding|1/8|c.96-1522T>C||||||,TC|intron_variant|MODIFIER|NR1I2|NR1I2|transcript|NM_022002.2|protein_coding|1/8|c.96-1515dupC||||||INFO_REALIGN_3_PRIME,C|intron_variant|MODIFIER|NR1I2|NR1I2|transcript|NM_003889.3|protein_coding|1/8|c.-22-1522T>C||||||,TC|intron_variant|MODIFIER|NR1I2|NR1I2|transcript|NM_003889.3|protein_codin…
chr4_70345076_G_A,*	-17.5661	18.5469	17.9491	3	50	48	69.1044	62.8515	68.8515	0.012557	18	3	22	8	0.660616	UGT2B4;UGT2B4;UGT2B4;UGT2B28-UGT2B4	downstream_gene_variant;downstream_gene_variant;downstream_gene_variant;intergenic_region	protein_coding;protein_coding;protein_coding;	ANN=A|downstream_gene_variant|MODIFIER|UGT2B4|UGT2B4|transcript|NM_021139.2|protein_coding||c.*1276C>T|||||807|,A|downstream_gene_variant|MODIFIER|UGT2B4|UGT2B4|transcript|NM_001297615.1|protein_coding||c.*1533C>T|||||807|,A|downstream_gene_variant|MODIFIER|UGT2B4|UGT2B4|transcript|NM_001297616.1|protein_coding||c.*1276C>T|||||807|,A|intergenic_region|MODIFIER|UGT2B28-UGT2B4|UGT2B28-UGT2B4|interg…
chr13_95862627_C_T	-0.182322	17.5674	0.470004	3	50	48	69.1044	62.9618	68.9618	0.0133645	21	0	25	5	0.660616	ABCC4;ABCC4;ABCC4;ABCC4	intron_variant;intron_variant;intron_variant;intron_variant	protein_coding;protein_coding;protein_coding;protein_coding	ANN=T|intron_variant|MODIFIER|ABCC4|ABCC4|transcript|NM_005845.4|protein_coding|5/30|c.621+319G>A||||||,T|intron_variant|MODIFIER|ABCC4|ABCC4|transcript|NM_001301829.1|protein_coding|5/29|c.621+319G>A||||||,T|intron_variant|MODIFIER|ABCC4|ABCC4|transcript|NM_001105515.2|protein_coding|5/20|c.621+319G>A||||||,T|intron_variant|MODIFIER|ABCC4|ABCC4|transcript|NM_001301830.1|protein_coding|4/19|c.396…
chr13_99344847_G_T	-0.182322	17.5674	0.470004	3	50	48	69.1044	62.9618	68.9618	0.0133645	21	0	25	5	0.660616	SLC15A1	intron_variant	protein_coding	ANN=T|intron_variant|MODIFIER|SLC15A1|SLC15A1|transcript|NM_005073.3|protein_coding|18/22|c.1467-4016C>A||||||
chr14_23271639_AC_A	-0.182322	17.5674	0.470004	3	50	48	69.1044	62.9618	68.9618	0.0133645	21	0	25	5	0.660616	SLC7A7;SLC7A7;SLC7A7	intron_variant;intron_variant;intron_variant	protein_coding;pseudogene;protein_coding	ANN=A|intron_variant|MODIFIER|SLC7A7|SLC7A7|transcript|NM_001126105.2|protein_coding|3/10|c.499+10469delG||||||,A|intron_variant|MODIFIER|SLC7A7|SLC7A7|transcript|NR_040448.1|pseudogene|2/9|n.1114+10469delG||||||,A|intron_variant|MODIFIER|SLC7A7|SLC7A7|transcript|NM_001126106.2|protein_coding|3/10|c.499+10469delG||||||
chr2_38305240_CAAAAA_CA,C	-0.182322	17.5674	0.470004	3	50	48	69.1044	62.9618	68.9618	0.0133645	21	0	25	5	0.660616	CYP1B1;CYP1B1;CYP1B1-CYP1B1-AS1;CYP1B1-CYP1B1-AS1	upstream_gene_variant;upstream_gene_variant;intergenic_region;intergenic_region	protein_coding;protein_coding;;	ANN=C|upstream_gene_variant|MODIFIER|CYP1B1|CYP1B1|transcript|NM_000104.3|protein_coding||c.-2714_-2710delTTTTT|||||1918|,CA|upstream_gene_variant|MODIFIER|CYP1B1|CYP1B1|transcript|NM_000104.3|protein_coding||c.-2714_-2711delTTTT|||||1919|,C|intergenic_region|MODIFIER|CYP1B1-CYP1B1-AS1|CYP1B1-CYP1B1-AS1|intergenic_region|CYP1B1-CYP1B1-AS1|||n.38305241_38305245delAAAAA||||||,CA|intergenic_region|M…
chr2_201521509_C_T	-0.182322	17.5674	0.470004	3	50	48	69.1044	62.9618	68.9618	0.0133645	21	0	25	5	0.660616	AOX1	intron_variant	protein_coding	ANN=T|intron_variant|MODIFIER|AOX1|AOX1|transcript|NM_001159.3|protein_coding|26/34|c.3076-56C>T||||||
chr13_95877407_TCACA_ACACA,*	-0.945837	2.78741	1.2871	3	50	48	69.1044	63.1086	69.1086	0.014523	20	1	23	7	0.660616	ABCC4;ABCC4;ABCC4;ABCC4	intron_variant;intron_variant;intron_variant;intron_variant	protein_coding;protein_coding;protein_coding;protein_coding	ANN=ACACA|intron_variant|MODIFIER|ABCC4|ABCC4|transcript|NM_005845.4|protein_coding|4/30|c.531+9457A>T||||||,ACACA|intron_variant|MODIFIER|ABCC4|ABCC4|transcript|NM_001301829.1|protein_coding|4/29|c.531+9457A>T||||||,ACACA|intron_variant|MODIFIER|ABCC4|ABCC4|transcript|NM_001105515.2|protein_coding|4/20|c.531+9457A>T||||||,ACACA|intron_variant|MODIFIER|ABCC4|ABCC4|transcript|NM_001301830.1|protei…
chr1_47264724_G_T	0.947856	-1.782	-0.276812	3	50	48	69.1044	63.1832	69.1832	0.0151515	13	8	27	3	0.660616	CYP4B1;CYP4B1	5_prime_UTR_variant;5_prime_UTR_variant	protein_coding;protein_coding	ANN=T|5_prime_UTR_variant|MODIFIER|CYP4B1|CYP4B1|transcript|NM_001099772.1|protein_coding|1/12|c.-30G>T|||||30|,T|5_prime_UTR_variant|MODIFIER|CYP4B1|CYP4B1|transcript|NM_000779.3|protein_coding|1/12|c.-30G>T|||||30|
chr1_146675091_G_A	-1.14473e-15	17.4262	0.236389	3	50	48	69.1044	63.2979	69.2979	0.0161716	21	0	25	5	0.660616	FMO5;FMO5;FMO5	intron_variant;intron_variant;intron_variant	protein_coding;protein_coding;protein_coding	ANN=A|intron_variant|MODIFIER|FMO5|FMO5|transcript|NM_001461.3|protein_coding|6/8|c.831-2005C>T||||||,A|intron_variant|MODIFIER|FMO5|FMO5|transcript|NM_001144829.2|protein_coding|6/8|c.831-2005C>T||||||,A|intron_variant|MODIFIER|FMO5|FMO5|transcript|NM_001144830.2|protein_coding|5/6|c.830+5323C>T||||||
chr1_146675092_T_A	-1.14473e-15	17.4262	0.236389	3	50	48	69.1044	63.2979	69.2979	0.0161716	21	0	25	5	0.660616	FMO5;FMO5;FMO5	intron_variant;intron_variant;intron_variant	protein_coding;protein_coding;protein_coding	ANN=A|intron_variant|MODIFIER|FMO5|FMO5|transcript|NM_001461.3|protein_coding|6/8|c.831-2006A>T||||||,A|intron_variant|MODIFIER|FMO5|FMO5|transcript|NM_001144829.2|protein_coding|6/8|c.831-2006A>T||||||,A|intron_variant|MODIFIER|FMO5|FMO5|transcript|NM_001144830.2|protein_coding|5/6|c.830+5322A>T||||||
chr11_17452603_T_G	4.72841e-16	17.4262	0.236389	3	50	48	69.1044	63.2979	69.2979	0.0161716	21	0	25	5	0.660616	ABCC8;ABCC8	intron_variant;intron_variant	protein_coding;protein_coding	ANN=G|intron_variant|MODIFIER|ABCC8|ABCC8|transcript|NM_001287174.1|protein_coding|11/38|c.1672-97A>C||||||,G|intron_variant|MODIFIER|ABCC8|ABCC8|transcript|NM_000352.4|protein_coding|11/38|c.1672-97A>C||||||
chr21_37502585_C_G	-3.82011e-16	17.4262	0.236389	3	50	48	69.1044	63.2979	69.2979	0.0161716	21	0	25	5	0.660616	LOC100133286;CBR3;CBR3-AS1;CBR3-AS1;LOC100133286-CBR3-AS1	upstream_gene_variant;upstream_gene_variant;downstream_gene_variant;downstream_gene_variant;intergenic_region	pseudogene;protein_coding;pseudogene;pseudogene;	ANN=G|upstream_gene_variant|MODIFIER|LOC100133286|LOC100133286|transcript|NR_040084.1|pseudogene||n.-3647G>C|||||3647|,G|upstream_gene_variant|MODIFIER|CBR3|CBR3|transcript|NM_001236.3|protein_coding||c.-4906C>G|||||4678|,G|downstream_gene_variant|MODIFIER|CBR3-AS1|CBR3-AS1|transcript|NR_038892.1|pseudogene||n.*1480G>C|||||1480|,G|downstream_gene_variant|MODIFIER|CBR3-AS1|CBR3-AS1|transcript|NR_0…
chr21_37503046_G_C	-3.82011e-16	17.4262	0.236389	3	50	48	69.1044	63.2979	69.2979	0.0161716	21	0	25	5	0.660616	LOC100133286;CBR3;CBR3-AS1;CBR3-AS1;LOC100133286-CBR3-AS1	upstream_gene_variant;upstream_gene_variant;downstream_gene_variant;downstream_gene_variant;intergenic_region	pseudogene;protein_coding;pseudogene;pseudogene;	ANN=C|upstream_gene_variant|MODIFIER|LOC100133286|LOC100133286|transcript|NR_040084.1|pseudogene||n.-4108C>G|||||4108|,C|upstream_gene_variant|MODIFIER|CBR3|CBR3|transcript|NM_001236.3|protein_coding||c.-4445G>C|||||4217|,C|downstream_gene_variant|MODIFIER|CBR3-AS1|CBR3-AS1|transcript|NR_038892.1|pseudogene||n.*1019C>G|||||1019|,C|downstream_gene_variant|MODIFIER|CBR3-AS1|CBR3-AS1|transcript|NR_0…
chr21_37505177_C_T	-3.82011e-16	17.4262	0.236389	3	50	48	69.1044	63.2979	69.2979	0.0161716	21	0	25	5	0.660616	CBR3;CBR3-AS1;CBR3-AS1	upstream_gene_variant;non_coding_exon_variant;non_coding_exon_variant	protein_coding;pseudogene;pseudogene	ANN=T|upstream_gene_variant|MODIFIER|CBR3|CBR3|transcript|NM_001236.3|protein_coding||c.-2314C>T|||||2086|,T|non_coding_exon_variant|MODIFIER|CBR3-AS1|CBR3-AS1|transcript|NR_038892.1|pseudogene|4/4|n.463G>A||||||,T|non_coding_exon_variant|MODIFIER|CBR3-AS1|CBR3-AS1|transcript|NR_038893.1|pseudogene|3/3|n.388G>A||||||
chr21_37508834_G_C	-3.82011e-16	17.4262	0.236389	3	50	48	69.1044	63.2979	69.2979	0.0161716	21	0	25	5	0.660616	CBR3-AS1;CBR3-AS1;CBR3;CBR3-AS1	downstream_gene_variant;intron_variant;intron_variant;intron_variant	pseudogene;pseudogene;protein_coding;pseudogene	ANN=C|downstream_gene_variant|MODIFIER|CBR3-AS1|CBR3-AS1|transcript|NR_038894.1|pseudogene||n.*4860C>G|||||4860|,C|intron_variant|MODIFIER|CBR3-AS1|CBR3-AS1|transcript|NR_038892.1|pseudogene|2/3|n.193-2775C>G||||||,C|intron_variant|MODIFIER|CBR3|CBR3|transcript|NM_001236.3|protein_coding|1/2|c.289+1055G>C||||||,C|intron_variant|MODIFIER|CBR3-AS1|CBR3-AS1|transcript|NR_038893.1|pseudogene|2/2|n.19…
chr21_37514172_G_T	-3.82011e-16	17.4262	0.236389	3	50	48	69.1044	63.2979	69.2979	0.0161716	21	0	25	5	0.660616	CBR3-AS1;CBR3;CBR3-AS1;CBR3-AS1	intron_variant;intron_variant;intron_variant;non_coding_exon_variant	pseudogene;protein_coding;pseudogene;pseudogene	ANN=T|intron_variant|MODIFIER|CBR3-AS1|CBR3-AS1|transcript|NR_038892.1|pseudogene|2/3|n.192+4382C>A||||||,T|intron_variant|MODIFIER|CBR3|CBR3|transcript|NM_001236.3|protein_coding|2/2|c.397+3942G>T||||||,T|intron_variant|MODIFIER|CBR3-AS1|CBR3-AS1|transcript|NR_038893.1|pseudogene|2/2|n.192+4382C>A||||||,T|non_coding_exon_variant|MODIFIER|CBR3-AS1|CBR3-AS1|transcript|NR_038894.1|pseudogene|3/3|n.…
chr21_37515713_A_T	-3.82011e-16	17.4262	0.236389	3	50	48	69.1044	63.2979	69.2979	0.0161716	21	0	25	5	0.660616	CBR3-AS1;CBR3;CBR3-AS1;CBR3-AS1	intron_variant;intron_variant;intron_variant;intron_variant	pseudogene;protein_coding;pseudogene;pseudogene	ANN=T|intron_variant|MODIFIER|CBR3-AS1|CBR3-AS1|transcript|NR_038892.1|pseudogene|2/3|n.192+2841T>A||||||,T|intron_variant|MODIFIER|CBR3|CBR3|transcript|NM_001236.3|protein_coding|2/2|c.398-2661A>T||||||,T|intron_variant|MODIFIER|CBR3-AS1|CBR3-AS1|transcript|NR_038893.1|pseudogene|2/2|n.192+2841T>A||||||,T|intron_variant|MODIFIER|CBR3-AS1|CBR3-AS1|transcript|NR_038894.1|pseudogene|2/2|n.193-1469T…
chr21_37523302_C_T	-3.82011e-16	17.4262	0.236389	3	50	48	69.1044	63.2979	69.2979	0.0161716	21	0	25	5	0.660616	CBR3;CBR3-AS1;CBR3-AS1;CBR3-AS1	downstream_gene_variant;intron_variant;intron_variant;intron_variant	protein_coding;pseudogene;pseudogene;pseudogene	ANN=T|downstream_gene_variant|MODIFIER|CBR3|CBR3|transcript|NM_001236.3|protein_coding||c.*4492C>T|||||4442|,T|intron_variant|MODIFIER|CBR3-AS1|CBR3-AS1|transcript|NR_038892.1|pseudogene|1/3|n.93-4649G>A||||||,T|intron_variant|MODIFIER|CBR3-AS1|CBR3-AS1|transcript|NR_038893.1|pseudogene|1/2|n.93-4649G>A||||||,T|intron_variant|MODIFIER|CBR3-AS1|CBR3-AS1|transcript|NR_038894.1|pseudogene|1/2|n.93-4…
chr4_88286354_A_G	4.05213e-16	17.4262	0.236389	3	50	48	69.1044	63.2979	69.2979	0.0161716	21	0	25	5	0.660616	HSD17B11	intron_variant	protein_coding	ANN=G|intron_variant|MODIFIER|HSD17B11|HSD17B11|transcript|NM_016245.4|protein_coding|4/6|c.557+7507T>C||||||
chr18_24542257_C_CT,CTT	-3.2948e-16	17.4262	0.236389	3	50	48	69.1044	63.2979	69.2979	0.0161716	21	0	25	5	0.660616	CHST9;CHST9;CHST9;CHST9	intron_variant;intron_variant;intron_variant;intron_variant	protein_coding;protein_coding;protein_coding;protein_coding	ANN=CT|intron_variant|MODIFIER|CHST9|CHST9|transcript|NM_031422.5|protein_coding|4/5|c.203-17928dupA||||||,CTT|intron_variant|MODIFIER|CHST9|CHST9|transcript|NM_031422.5|protein_coding|4/5|c.203-17929_203-17928dupAA||||||,CT|intron_variant|MODIFIER|CHST9|CHST9|transcript|NM_001256316.1|protein_coding|4/4|c.203-44944dupA||||||,CTT|intron_variant|MODIFIER|CHST9|CHST9|transcript|NM_001256316.1|prote…
chr4_89092426_T_TA	-3.2948e-16	17.4262	0.236389	3	50	48	69.1044	63.2979	69.2979	0.0161716	21	0	25	5	0.660616	ABCG2	intron_variant	protein_coding	ANN=TA|intron_variant|MODIFIER|ABCG2|ABCG2|transcript|NM_001257386.1|protein_coding|1/15|c.-19-31261dupT||||||
chr2_169847203_T_C	0.287682	17.4409	-0.162519	3	50	48	69.1044	63.3578	69.3578	0.0167325	21	0	25	5	0.660616	ABCB11	intron_variant	protein_coding	ANN=C|intron_variant|MODIFIER|ABCB11|ABCB11|transcript|NM_003742.2|protein_coding|9/27|c.908+108A>G||||||
chr1_47282772_C_T	0.730139	-1.51668	0.126636	3	50	48	69.1044	63.3761	69.3761	0.016908	11	10	25	5	0.660616	CYP4B1;CYP4B1	missense_variant;missense_variant	protein_coding;protein_coding	ANN=T|missense_variant|MODERATE|CYP4B1|CYP4B1|transcript|NM_001099772.1|protein_coding|9/12|c.1126C>T|p.Arg376Cys|1210/2158|1126/1539|376/512||,T|missense_variant|MODERATE|CYP4B1|CYP4B1|transcript|NM_000779.3|protein_coding|9/12|c.1123C>T|p.Arg375Cys|1207/2155|1123/1536|375/511||
chr8_143959289_T_C	-0.66759	1.51744	-0.0384174	3	50	48	69.1044	63.4081	69.4081	0.0172194	10	11	5	25	0.660616	CYP11B1;CYP11B1	intron_variant;intron_variant	protein_coding;protein_coding	ANN=C|intron_variant|MODIFIER|CYP11B1|CYP11B1|transcript|NM_000497.3|protein_coding|2/8|c.396-651A>G||||||,C|intron_variant|MODIFIER|CYP11B1|CYP11B1|transcript|NM_001026213.1|protein_coding|2/7|c.396-651A>G||||||
chr1_94476467_T_A	0.154151	17.3894	0.0281709	3	50	48	69.1044	63.4194	69.4194	0.017331	21	0	25	5	0.660616	ABCA4	missense_variant	protein_coding	ANN=A|missense_variant|MODERATE|ABCA4|ABCA4|transcript|NM_000350.2|protein_coding|40/50|c.5603A>T|p.Asn1868Ile|5707/7325|5603/6822|1868/2273||
chr11_17429872_G_A	0.154151	17.3894	0.0281709	3	50	48	69.1044	63.4194	69.4194	0.017331	21	0	25	5	0.660616	ABCC8;ABCC8	intron_variant;intron_variant	protein_coding;protein_coding	ANN=A|intron_variant|MODIFIER|ABCC8|ABCC8|transcript|NM_001287174.1|protein_coding|23/38|c.2823+67C>T||||||,A|intron_variant|MODIFIER|ABCC8|ABCC8|transcript|NM_000352.4|protein_coding|23/38|c.2820+67C>T||||||
chr11_17434284_G_A	0.154151	17.3894	0.0281709	3	50	48	69.1044	63.4194	69.4194	0.017331	21	0	25	5	0.660616	ABCC8;ABCC8	synonymous_variant;synonymous_variant	protein_coding;protein_coding	ANN=A|synonymous_variant|LOW|ABCC8|ABCC8|transcript|NM_001287174.1|protein_coding|21/39|c.2488C>T|p.Leu830Leu|2557/4924|2488/4749|830/1582||,A|synonymous_variant|LOW|ABCC8|ABCC8|transcript|NM_000352.4|protein_coding|21/39|c.2485C>T|p.Leu829Leu|2554/4921|2485/4746|829/1581||
chr11_17436271_G_A	0.154151	17.3894	0.0281709	3	50	48	69.1044	63.4194	69.4194	0.017331	21	0	25	5	0.660616	ABCC8;ABCC8	intron_variant;intron_variant	protein_coding;protein_coding	ANN=A|intron_variant|MODIFIER|ABCC8|ABCC8|transcript|NM_001287174.1|protein_coding|18/38|c.2295-114C>T||||||,A|intron_variant|MODIFIER|ABCC8|ABCC8|transcript|NM_000352.4|protein_coding|18/38|c.2292-114C>T||||||
chr15_58306551_G_A	0.154151	17.3894	0.0281709	3	50	48	69.1044	63.4194	69.4194	0.017331	21	0	25	5	0.660616	ALDH1A2;ALDH1A2;ALDH1A2;ALDH1A2	upstream_gene_variant;intron_variant;intron_variant;intron_variant	protein_coding;protein_coding;protein_coding;protein_coding	ANN=A|upstream_gene_variant|MODIFIER|ALDH1A2|ALDH1A2|transcript|NM_170697.2|protein_coding||c.-421C>T|||||256|,A|intron_variant|MODIFIER|ALDH1A2|ALDH1A2|transcript|NM_003888.3|protein_coding|1/12|c.118-72C>T||||||,A|intron_variant|MODIFIER|ALDH1A2|ALDH1A2|transcript|NM_001206897.1|protein_coding|2/13|c.55-72C>T||||||,A|intron_variant|MODIFIER|ALDH1A2|ALDH1A2|transcript|NM_170696.2|protein_coding|…
chr17_9678156_G_A	0.154151	17.3894	0.0281709	3	50	48	69.1044	63.4194	69.4194	0.017331	21	0	25	5	0.660616	DHRS7C;DHRS7C	intron_variant;intron_variant	protein_coding;protein_coding	ANN=A|intron_variant|MODIFIER|DHRS7C|DHRS7C|transcript|NM_001220493.1|protein_coding|4/5|c.575-1917C>T||||||,A|intron_variant|MODIFIER|DHRS7C|DHRS7C|transcript|NM_001105571.2|protein_coding|4/5|c.572-1917C>T||||||
chr19_41350594_G_A	0.154151	17.3894	0.0281709	3	50	48	69.1044	63.4194	69.4194	0.017331	21	0	25	5	0.660616	CYP2A6	synonymous_variant	protein_coding	ANN=A|synonymous_variant|LOW|CYP2A6|CYP2A6|transcript|NM_000762.5|protein_coding|8/9|c.1245C>T|p.His415His|1266/1764|1245/1485|415/494||
chr13_95864441_T_A,*	-0.405465	17.9715	0.788457	3	50	48	69.1044	63.4208	69.4208	0.0173443	21	0	26	4	0.660616	ABCC4;ABCC4;ABCC4;ABCC4	intron_variant;intron_variant;intron_variant;intron_variant	protein_coding;protein_coding;protein_coding;protein_coding	ANN=A|intron_variant|MODIFIER|ABCC4|ABCC4|transcript|NM_005845.4|protein_coding|4/30|c.532-1406A>T||||||,A|intron_variant|MODIFIER|ABCC4|ABCC4|transcript|NM_001301829.1|protein_coding|4/29|c.532-1406A>T||||||,A|intron_variant|MODIFIER|ABCC4|ABCC4|transcript|NM_001105515.2|protein_coding|4/20|c.532-1406A>T||||||,A|intron_variant|MODIFIER|ABCC4|ABCC4|transcript|NM_001301830.1|protein_coding|3/19|c.…
chr4_24795513_C_T	-0.405465	17.9715	0.788457	3	50	48	69.1044	63.4208	69.4208	0.0173443	21	0	26	4	0.660616	SOD3;DHX15-SOD3	upstream_gene_variant;intergenic_region	protein_coding;	ANN=T|upstream_gene_variant|MODIFIER|SOD3|SOD3|transcript|NM_003102.2|protein_coding||c.-5631C>T|||||1572|,T|intergenic_region|MODIFIER|DHX15-SOD3|DHX15-SOD3|intergenic_region|DHX15-SOD3|||n.24795513C>T||||||
chr1_47265916_TCC_T	-0.405465	17.9715	0.788457	3	50	48	69.1044	63.4208	69.4208	0.0173443	21	0	26	4	0.660616	CYP4B1;CYP4B1	intron_variant;intron_variant	protein_coding;protein_coding	ANN=T|intron_variant|MODIFIER|CYP4B1|CYP4B1|transcript|NM_001099772.1|protein_coding|1/11|c.180+984_180+985delCC||||||,T|intron_variant|MODIFIER|CYP4B1|CYP4B1|transcript|NM_000779.3|protein_coding|1/11|c.180+984_180+985delCC||||||
chr1_47265930_C_T	-0.405465	17.9715	0.788457	3	50	48	69.1044	63.4208	69.4208	0.0173443	21	0	26	4	0.660616	CYP4B1;CYP4B1	intron_variant;intron_variant	protein_coding;protein_coding	ANN=T|intron_variant|MODIFIER|CYP4B1|CYP4B1|transcript|NM_001099772.1|protein_coding|1/11|c.180+997C>T||||||,T|intron_variant|MODIFIER|CYP4B1|CYP4B1|transcript|NM_000779.3|protein_coding|1/11|c.180+997C>T||||||
chr1_97789082_A_G,*	-0.405465	17.9715	0.788457	3	50	48	69.1044	63.4208	69.4208	0.0173443	21	0	26	4	0.660616	DPYD-AS1;DPYD	downstream_gene_variant;intron_variant	pseudogene;protein_coding	ANN=G|downstream_gene_variant|MODIFIER|DPYD-AS1|DPYD-AS1|transcript|NR_046590.1|pseudogene||n.*571A>G|||||571|,G|intron_variant|MODIFIER|DPYD|DPYD|transcript|NM_000110.3|protein_coding|16/22|c.2059-17229T>C||||||
chr12_117764196_AAAAAAAAAAAC_A,*	17.5661	-17.9715	-17.1831	3	50	48	69.1044	63.4208	69.4208	0.0173443	15	6	26	4	0.660616	NOS1;NOS1	intron_variant;intron_variant	protein_coding;protein_coding	ANN=A|intron_variant|MODIFIER|NOS1|NOS1|transcript|NM_001204218.1|protein_coding|2/29|c.725+3943_725+3953delGTTTTTTTTTT||||||,A|intron_variant|MODIFIER|NOS1|NOS1|transcript|NM_000620.4|protein_coding|2/28|c.725+3943_725+3953delGTTTTTTTTTT||||||
chr15_92630380_A_C	-0.405465	17.9715	0.788457	3	50	48	69.1044	63.4208	69.4208	0.0173443	21	0	26	4	0.660616	SLCO3A1;SLCO3A1	intron_variant;intron_variant	protein_coding;protein_coding	ANN=C|intron_variant|MODIFIER|SLCO3A1|SLCO3A1|transcript|NM_013272.3|protein_coding|2/9|c.647-7731A>C||||||,C|intron_variant|MODIFIER|SLCO3A1|SLCO3A1|transcript|NM_001145044.1|protein_coding|2/10|c.647-7731A>C||||||
chr15_92630390_T_C	-0.405465	17.9715	0.788457	3	50	48	69.1044	63.4208	69.4208	0.0173443	21	0	26	4	0.660616	SLCO3A1;SLCO3A1	intron_variant;intron_variant	protein_coding;protein_coding	ANN=C|intron_variant|MODIFIER|SLCO3A1|SLCO3A1|transcript|NM_013272.3|protein_coding|2/9|c.647-7721T>C||||||,C|intron_variant|MODIFIER|SLCO3A1|SLCO3A1|transcript|NM_001145044.1|protein_coding|2/10|c.647-7721T>C||||||
chr17_37819894_G_C	-0.405465	17.9715	0.788457	3	50	48	69.1044	63.4208	69.4208	0.0173443	21	0	26	4	0.660616	STARD3;STARD3;STARD3;TCAP;PNMT;PNMT	3_prime_UTR_variant;3_prime_UTR_variant;3_prime_UTR_variant;upstream_gene_variant;upstream_gene_variant;upstream_gene_variant	protein_coding;protein_coding;protein_coding;protein_coding;protein_coding;pseudogene	ANN=C|3_prime_UTR_variant|MODIFIER|STARD3|STARD3|transcript|NM_001165937.1|protein_coding|15/15|c.*733G>C|||||733|,C|3_prime_UTR_variant|MODIFIER|STARD3|STARD3|transcript|NM_001165938.1|protein_coding|14/14|c.*733G>C|||||733|,C|3_prime_UTR_variant|MODIFIER|STARD3|STARD3|transcript|NM_006804.3|protein_coding|15/15|c.*733G>C|||||733|,C|upstream_gene_variant|MODIFIER|TCAP|TCAP|transcript|NM_003673.3…
chr17_37819898_A_C	-0.405465	17.9715	0.788457	3	50	48	69.1044	63.4208	69.4208	0.0173443	21	0	26	4	0.660616	STARD3;STARD3;STARD3;TCAP;PNMT;PNMT	3_prime_UTR_variant;3_prime_UTR_variant;3_prime_UTR_variant;upstream_gene_variant;upstream_gene_variant;upstream_gene_variant	protein_coding;protein_coding;protein_coding;protein_coding;protein_coding;pseudogene	ANN=C|3_prime_UTR_variant|MODIFIER|STARD3|STARD3|transcript|NM_001165937.1|protein_coding|15/15|c.*737A>C|||||737|,C|3_prime_UTR_variant|MODIFIER|STARD3|STARD3|transcript|NM_001165938.1|protein_coding|14/14|c.*737A>C|||||737|,C|3_prime_UTR_variant|MODIFIER|STARD3|STARD3|transcript|NM_006804.3|protein_coding|15/15|c.*737A>C|||||737|,C|upstream_gene_variant|MODIFIER|TCAP|TCAP|transcript|NM_003673.3…
chr17_37819905_A_C	-0.405465	17.9715	0.788457	3	50	48	69.1044	63.4208	69.4208	0.0173443	21	0	26	4	0.660616	STARD3;STARD3;STARD3;TCAP;PNMT;PNMT	3_prime_UTR_variant;3_prime_UTR_variant;3_prime_UTR_variant;upstream_gene_variant;upstream_gene_variant;upstream_gene_variant	protein_coding;protein_coding;protein_coding;protein_coding;protein_coding;pseudogene	ANN=C|3_prime_UTR_variant|MODIFIER|STARD3|STARD3|transcript|NM_001165937.1|protein_coding|15/15|c.*744A>C|||||744|,C|3_prime_UTR_variant|MODIFIER|STARD3|STARD3|transcript|NM_001165938.1|protein_coding|14/14|c.*744A>C|||||744|,C|3_prime_UTR_variant|MODIFIER|STARD3|STARD3|transcript|NM_006804.3|protein_coding|15/15|c.*744A>C|||||744|,C|upstream_gene_variant|MODIFIER|TCAP|TCAP|transcript|NM_003673.3…
chr17_37819907_T_C	-0.405465	17.9715	0.788457	3	50	48	69.1044	63.4208	69.4208	0.0173443	21	0	26	4	0.660616	STARD3;STARD3;STARD3;TCAP;PNMT;PNMT	3_prime_UTR_variant;3_prime_UTR_variant;3_prime_UTR_variant;upstream_gene_variant;upstream_gene_variant;upstream_gene_variant	protein_coding;protein_coding;protein_coding;protein_coding;protein_coding;pseudogene	ANN=C|3_prime_UTR_variant|MODIFIER|STARD3|STARD3|transcript|NM_001165937.1|protein_coding|15/15|c.*746T>C|||||746|,C|3_prime_UTR_variant|MODIFIER|STARD3|STARD3|transcript|NM_001165938.1|protein_coding|14/14|c.*746T>C|||||746|,C|3_prime_UTR_variant|MODIFIER|STARD3|STARD3|transcript|NM_006804.3|protein_coding|15/15|c.*746T>C|||||746|,C|upstream_gene_variant|MODIFIER|TCAP|TCAP|transcript|NM_003673.3…
chr19_41632316_A_G	-0.405465	17.9715	0.788457	3	50	48	69.1044	63.4208	69.4208	0.0173443	21	0	26	4	0.660616	CYP2F1	intron_variant	protein_coding	ANN=G|intron_variant|MODIFIER|CYP2F1|CYP2F1|transcript|NM_000774.3|protein_coding|9/9|c.1294+777A>G||||||
chr21_43685637_C_T	-0.405465	17.9715	0.788457	3	50	48	69.1044	63.4208	69.4208	0.0173443	21	0	26	4	0.660616	ABCG1;ABCG1;ABCG1;ABCG1;ABCG1;ABCG1	intron_variant;intron_variant;intron_variant;intron_variant;intron_variant;intron_variant	protein_coding;protein_coding;protein_coding;protein_coding;protein_coding;protein_coding	ANN=T|intron_variant|MODIFIER|ABCG1|ABCG1|transcript|NM_004915.3|protein_coding|2/14|c.287-5543C>T||||||,T|intron_variant|MODIFIER|ABCG1|ABCG1|transcript|NM_207627.1|protein_coding|3/15|c.293-5543C>T||||||,T|intron_variant|MODIFIER|ABCG1|ABCG1|transcript|NM_207628.1|protein_coding|4/16|c.221-5543C>T||||||,T|intron_variant|MODIFIER|ABCG1|ABCG1|transcript|NM_207629.1|protein_coding|2/14|c.278-5543C…
chr4_69530383_A_C	17.5661	-17.9715	-17.1831	3	50	48	69.1044	63.4208	69.4208	0.0173443	15	6	26	4	0.660616	UGT2B15	intron_variant	protein_coding	ANN=C|intron_variant|MODIFIER|UGT2B15|UGT2B15|transcript|NM_001076.3|protein_coding|2/5|c.874-1526T>G||||||
chr6_32789168_T_C	-0.405465	17.9715	0.788457	3	50	48	69.1044	63.4208	69.4208	0.0173443	21	0	26	4	0.660616	HLA-DOB;TAP2;TAP2;TAP2;HLA-DOB-TAP2	upstream_gene_variant;downstream_gene_variant;downstream_gene_variant;downstream_gene_variant;intergenic_region	protein_coding;protein_coding;protein_coding;protein_coding;	ANN=C|upstream_gene_variant|MODIFIER|HLA-DOB|HLA-DOB|transcript|NM_002120.3|protein_coding||c.-4440A>G|||||4343|,C|downstream_gene_variant|MODIFIER|TAP2|TAP2.2|transcript|NM_000544.3.8|protein_coding||c.*7464A>G|||||4019|,C|downstream_gene_variant|MODIFIER|TAP2|TAP2.2|transcript|NM_018833.2.2|protein_coding||c.*898A>G|||||442|,C|downstream_gene_variant|MODIFIER|TAP2|TAP2.2|transcript|NM_001290043…
chr6_32789197_C_A	-0.405465	17.9715	0.788457	3	50	48	69.1044	63.4208	69.4208	0.0173443	21	0	26	4	0.660616	HLA-DOB;TAP2;TAP2;TAP2;HLA-DOB-TAP2	upstream_gene_variant;downstream_gene_variant;downstream_gene_variant;downstream_gene_variant;intergenic_region	protein_coding;protein_coding;protein_coding;protein_coding;	ANN=A|upstream_gene_variant|MODIFIER|HLA-DOB|HLA-DOB|transcript|NM_002120.3|protein_coding||c.-4469G>T|||||4372|,A|downstream_gene_variant|MODIFIER|TAP2|TAP2.2|transcript|NM_000544.3.8|protein_coding||c.*7435G>T|||||3990|,A|downstream_gene_variant|MODIFIER|TAP2|TAP2.2|transcript|NM_018833.2.2|protein_coding||c.*869G>T|||||413|,A|downstream_gene_variant|MODIFIER|TAP2|TAP2.2|transcript|NM_001290043…
chr6_32789702_G_A	-0.405465	17.9715	0.788457	3	50	48	69.1044	63.4208	69.4208	0.0173443	21	0	26	4	0.660616	TAP2;HLA-DOB;TAP2;TAP2	3_prime_UTR_variant;upstream_gene_variant;downstream_gene_variant;downstream_gene_variant	protein_coding;protein_coding;protein_coding;protein_coding	ANN=A|3_prime_UTR_variant|MODIFIER|TAP2|TAP2.2|transcript|NM_018833.2.2|protein_coding|12/12|c.*364C>T|||||364|,A|upstream_gene_variant|MODIFIER|HLA-DOB|HLA-DOB|transcript|NM_002120.3|protein_coding||c.-4974C>T|||||4877|,A|downstream_gene_variant|MODIFIER|TAP2|TAP2.2|transcript|NM_000544.3.8|protein_coding||c.*6930C>T|||||3485|,A|downstream_gene_variant|MODIFIER|TAP2|TAP2.2|transcript|NM_00129004…
chr6_32789739_G_C,T	-0.405465	17.9715	0.788457	3	50	48	69.1044	63.4208	69.4208	0.0173443	21	0	26	4	0.660616	TAP2;TAP2;HLA-DOB;HLA-DOB;TAP2;TAP2;TAP2;TAP2	3_prime_UTR_variant;3_prime_UTR_variant;upstream_gene_variant;upstream_gene_variant;downstream_gene_variant;downstream_gene_variant;downstream_gene_variant;downstream_gene_variant	protein_coding;protein_coding;protein_coding;protein_coding;protein_coding;protein_coding;protein_coding;protein_coding	ANN=C|3_prime_UTR_variant|MODIFIER|TAP2|TAP2.2|transcript|NM_018833.2.2|protein_coding|12/12|c.*327C>G|||||327|,T|3_prime_UTR_variant|MODIFIER|TAP2|TAP2.2|transcript|NM_018833.2.2|protein_coding|12/12|c.*327C>A|||||327|,C|upstream_gene_variant|MODIFIER|HLA-DOB|HLA-DOB|transcript|NM_002120.3|protein_coding||c.-5011C>G|||||4914|,T|upstream_gene_variant|MODIFIER|HLA-DOB|HLA-DOB|transcript|NM_002120.…
chr6_32789742_T_C	-0.405465	17.9715	0.788457	3	50	48	69.1044	63.4208	69.4208	0.0173443	21	0	26	4	0.660616	TAP2;HLA-DOB;TAP2;TAP2	3_prime_UTR_variant;upstream_gene_variant;downstream_gene_variant;downstream_gene_variant	protein_coding;protein_coding;protein_coding;protein_coding	ANN=C|3_prime_UTR_variant|MODIFIER|TAP2|TAP2.2|transcript|NM_018833.2.2|protein_coding|12/12|c.*324A>G|||||324|,C|upstream_gene_variant|MODIFIER|HLA-DOB|HLA-DOB|transcript|NM_002120.3|protein_coding||c.-5014A>G|||||4917|,C|downstream_gene_variant|MODIFIER|TAP2|TAP2.2|transcript|NM_000544.3.8|protein_coding||c.*6890A>G|||||3445|,C|downstream_gene_variant|MODIFIER|TAP2|TAP2.2|transcript|NM_00129004…
chr6_32789807_C_T	-0.405465	17.9715	0.788457	3	50	48	69.1044	63.4208	69.4208	0.0173443	21	0	26	4	0.660616	TAP2;HLA-DOB;TAP2;TAP2	3_prime_UTR_variant;upstream_gene_variant;downstream_gene_variant;downstream_gene_variant	protein_coding;protein_coding;protein_coding;protein_coding	ANN=T|3_prime_UTR_variant|MODIFIER|TAP2|TAP2.2|transcript|NM_018833.2.2|protein_coding|12/12|c.*259G>A|||||259|,T|upstream_gene_variant|MODIFIER|HLA-DOB|HLA-DOB|transcript|NM_002120.3|protein_coding||c.-5079G>A|||||4982|,T|downstream_gene_variant|MODIFIER|TAP2|TAP2.2|transcript|NM_000544.3.8|protein_coding||c.*6825G>A|||||3380|,T|downstream_gene_variant|MODIFIER|TAP2|TAP2.2|transcript|NM_00129004…
chr6_32789955_C_T	-0.405465	17.9715	0.788457	3	50	48	69.1044	63.4208	69.4208	0.0173443	21	0	26	4	0.660616	TAP2;TAP2;TAP2	3_prime_UTR_variant;downstream_gene_variant;downstream_gene_variant	protein_coding;protein_coding;protein_coding	ANN=T|3_prime_UTR_variant|MODIFIER|TAP2|TAP2.2|transcript|NM_018833.2.2|protein_coding|12/12|c.*111G>A|||||111|,T|downstream_gene_variant|MODIFIER|TAP2|TAP2.2|transcript|NM_000544.3.8|protein_coding||c.*6677G>A|||||3232|,T|downstream_gene_variant|MODIFIER|TAP2|TAP2.2|transcript|NM_001290043.1.8|protein_coding||c.*6728G>A|||||3232|
chr6_32790089_G_A	-0.405465	17.9715	0.788457	3	50	48	69.1044	63.4208	69.4208	0.0173443	21	0	26	4	0.660616	TAP2;TAP2;TAP2	missense_variant;downstream_gene_variant;downstream_gene_variant	protein_coding;protein_coding;protein_coding	ANN=A|missense_variant|MODERATE|TAP2|TAP2.2|transcript|NM_018833.2.2|protein_coding|12/12|c.1939C>T|p.Leu647Phe|2061/2540|1939/1962|647/653||,A|downstream_gene_variant|MODIFIER|TAP2|TAP2.2|transcript|NM_000544.3.8|protein_coding||c.*6543C>T|||||3098|,A|downstream_gene_variant|MODIFIER|TAP2|TAP2.2|transcript|NM_001290043.1.8|protein_coding||c.*6594C>T|||||3098|
chr6_32790273_A_T	-0.405465	17.9715	0.788457	3	50	48	69.1044	63.4208	69.4208	0.0173443	21	0	26	4	0.660616	TAP2;TAP2;TAP2	downstream_gene_variant;downstream_gene_variant;intron_variant	protein_coding;protein_coding;protein_coding	ANN=T|downstream_gene_variant|MODIFIER|TAP2|TAP2.2|transcript|NM_000544.3.8|protein_coding||c.*6359T>A|||||2914|,T|downstream_gene_variant|MODIFIER|TAP2|TAP2.2|transcript|NM_001290043.1.8|protein_coding||c.*6410T>A|||||2914|,T|intron_variant|MODIFIER|TAP2|TAP2.2|transcript|NM_018833.2.2|protein_coding|11/11|c.1933-178T>A||||||
chr6_32790404_A_ACTC	-0.405465	17.9715	0.788457	3	50	48	69.1044	63.4208	69.4208	0.0173443	21	0	26	4	0.660616	TAP2;TAP2;TAP2	downstream_gene_variant;downstream_gene_variant;intron_variant	protein_coding;protein_coding;protein_coding	ANN=ACTC|downstream_gene_variant|MODIFIER|TAP2|TAP2.2|transcript|NM_000544.3.8|protein_coding||c.*6227_*6228insGAG|||||2782|,ACTC|downstream_gene_variant|MODIFIER|TAP2|TAP2.2|transcript|NM_001290043.1.8|protein_coding||c.*6278_*6279insGAG|||||2782|,ACTC|intron_variant|MODIFIER|TAP2|TAP2.2|transcript|NM_018833.2.2|protein_coding|11/11|c.1933-310_1933-309insGAG||||||
chr6_32790438_T_C	-0.405465	17.9715	0.788457	3	50	48	69.1044	63.4208	69.4208	0.0173443	21	0	26	4	0.660616	TAP2;TAP2;TAP2	downstream_gene_variant;downstream_gene_variant;intron_variant	protein_coding;protein_coding;protein_coding	ANN=C|downstream_gene_variant|MODIFIER|TAP2|TAP2.2|transcript|NM_000544.3.8|protein_coding||c.*6194A>G|||||2749|,C|downstream_gene_variant|MODIFIER|TAP2|TAP2.2|transcript|NM_001290043.1.8|protein_coding||c.*6245A>G|||||2749|,C|intron_variant|MODIFIER|TAP2|TAP2.2|transcript|NM_018833.2.2|protein_coding|11/11|c.1933-343A>G||||||
chr6_32790498_C_T	-0.405465	17.9715	0.788457	3	50	48	69.1044	63.4208	69.4208	0.0173443	21	0	26	4	0.660616	TAP2;TAP2;TAP2	downstream_gene_variant;downstream_gene_variant;intron_variant	protein_coding;protein_coding;protein_coding	ANN=T|downstream_gene_variant|MODIFIER|TAP2|TAP2.2|transcript|NM_000544.3.8|protein_coding||c.*6134G>A|||||2689|,T|downstream_gene_variant|MODIFIER|TAP2|TAP2.2|transcript|NM_001290043.1.8|protein_coding||c.*6185G>A|||||2689|,T|intron_variant|MODIFIER|TAP2|TAP2.2|transcript|NM_018833.2.2|protein_coding|11/11|c.1933-403G>A||||||
chr6_32790630_T_C	-0.405465	17.9715	0.788457	3	50	48	69.1044	63.4208	69.4208	0.0173443	21	0	26	4	0.660616	TAP2;TAP2;TAP2	downstream_gene_variant;downstream_gene_variant;intron_variant	protein_coding;protein_coding;protein_coding	ANN=C|downstream_gene_variant|MODIFIER|TAP2|TAP2.2|transcript|NM_000544.3.8|protein_coding||c.*6002A>G|||||2557|,C|downstream_gene_variant|MODIFIER|TAP2|TAP2.2|transcript|NM_001290043.1.8|protein_coding||c.*6053A>G|||||2557|,C|intron_variant|MODIFIER|TAP2|TAP2.2|transcript|NM_018833.2.2|protein_coding|11/11|c.1933-535A>G||||||
chr6_32790982_T_C	-0.405465	17.9715	0.788457	3	50	48	69.1044	63.4208	69.4208	0.0173443	21	0	26	4	0.660616	TAP2;TAP2;TAP2	downstream_gene_variant;downstream_gene_variant;intron_variant	protein_coding;protein_coding;protein_coding	ANN=C|downstream_gene_variant|MODIFIER|TAP2|TAP2.2|transcript|NM_000544.3.8|protein_coding||c.*5650A>G|||||2205|,C|downstream_gene_variant|MODIFIER|TAP2|TAP2.2|transcript|NM_001290043.1.8|protein_coding||c.*5701A>G|||||2205|,C|intron_variant|MODIFIER|TAP2|TAP2.2|transcript|NM_018833.2.2|protein_coding|11/11|c.1933-887A>G||||||
chr6_32791139_C_T	-0.405465	17.9715	0.788457	3	50	48	69.1044	63.4208	69.4208	0.0173443	21	0	26	4	0.660616	TAP2;TAP2;TAP2	downstream_gene_variant;downstream_gene_variant;intron_variant	protein_coding;protein_coding;protein_coding	ANN=T|downstream_gene_variant|MODIFIER|TAP2|TAP2.2|transcript|NM_000544.3.8|protein_coding||c.*5493G>A|||||2048|,T|downstream_gene_variant|MODIFIER|TAP2|TAP2.2|transcript|NM_001290043.1.8|protein_coding||c.*5544G>A|||||2048|,T|intron_variant|MODIFIER|TAP2|TAP2.2|transcript|NM_018833.2.2|protein_coding|11/11|c.1933-1044G>A||||||
chr6_32793255_C_G	-0.405465	17.9715	0.788457	3	50	48	69.1044	63.4208	69.4208	0.0173443	21	0	26	4	0.660616	TAP2;TAP2;TAP2	3_prime_UTR_variant;3_prime_UTR_variant;intron_variant	protein_coding;protein_coding;protein_coding	ANN=G|3_prime_UTR_variant|MODIFIER|TAP2|TAP2.2|transcript|NM_000544.3.8|protein_coding|12/12|c.*3377G>C|||||3377|,G|3_prime_UTR_variant|MODIFIER|TAP2|TAP2.2|transcript|NM_001290043.1.8|protein_coding|12/12|c.*3428G>C|||||3428|,G|intron_variant|MODIFIER|TAP2|TAP2.2|transcript|NM_018833.2.2|protein_coding|11/11|c.1933-3160G>C||||||
chr10_96568926_G_A	0.969826	-2.43755	-0.474312	3	50	48	69.1044	63.5663	69.5663	0.0188469	16	5	29	1	0.660616	CYP2C19	intron_variant	protein_coding	ANN=A|intron_variant|MODIFIER|CYP2C19|CYP2C19|transcript|NM_000769.2|protein_coding|5/8|c.820-11327G>A||||||
chr12_104879547_TATC_T	0.969826	-2.43755	-0.474312	3	50	48	69.1044	63.5663	69.5663	0.0188469	16	5	29	1	0.660616	CHST11;CHST11	intron_variant;intron_variant	protein_coding;protein_coding	ANN=T|intron_variant|MODIFIER|CHST11|CHST11|transcript|NM_018413.5|protein_coding|1/2|c.118+28243_118+28245delCAT||||||INFO_REALIGN_3_PRIME,T|intron_variant|MODIFIER|CHST11|CHST11|transcript|NM_001173982.1|protein_coding|1/2|c.103+28258_103+28260delCAT||||||INFO_REALIGN_3_PRIME
chr14_23262389_G_A	-0.368833	2.21876	0.590413	3	50	48	69.1044	63.728	69.728	0.0206754	20	1	22	8	0.660616	SLC7A7;SLC7A7;SLC7A7	intron_variant;intron_variant;intron_variant	protein_coding;pseudogene;protein_coding	ANN=A|intron_variant|MODIFIER|SLC7A7|SLC7A7|transcript|NM_001126105.2|protein_coding|3/10|c.500-13129C>T||||||,A|intron_variant|MODIFIER|SLC7A7|SLC7A7|transcript|NR_040448.1|pseudogene|2/9|n.1115-13129C>T||||||,A|intron_variant|MODIFIER|SLC7A7|SLC7A7|transcript|NM_001126106.2|protein_coding|3/10|c.500-13129C>T||||||
chr1_47398743_G_C	-0.434573	1.87996	-0.866823	3	50	48	69.1044	63.819	69.819	0.0217833	8	13	4	26	0.660616	CYP4A11	intron_variant	protein_coding	ANN=C|intron_variant|MODIFIER|CYP4A11|CYP4A11|transcript|NM_000778.3|protein_coding|9/11|c.1223-24C>G||||||
chr15_45566697_GCAAA_G	0.744987	-2.25894	-0.197464	3	50	48	69.1044	63.8996	69.8996	0.0228171	16	5	29	1	0.660616	LOC101928414;SLC28A2	intron_variant;intron_variant	pseudogene;protein_coding	ANN=G|intron_variant|MODIFIER|LOC101928414|LOC101928414|transcript|NR_120335.1|pseudogene|1/4|n.26+4694_26+4697delTTTG||||||,G|intron_variant|MODIFIER|SLC28A2|SLC28A2|transcript|NM_004212.3|protein_coding|17/17|c.1860-880_1860-877delCAAA||||||INFO_REALIGN_3_PRIME
chr16_16077602_G_C	0.744987	-2.25894	-0.197464	3	50	48	69.1044	63.8996	69.8996	0.0228171	16	5	29	1	0.660616	ABCC1	intron_variant	protein_coding	ANN=C|intron_variant|MODIFIER|ABCC1|ABCC1|transcript|NM_004996.3|protein_coding|1/30|c.49-24071G>C||||||
chr16_16147774_C_T	0.744987	-2.25894	-0.197464	3	50	48	69.1044	63.8996	69.8996	0.0228171	16	5	29	1	0.660616	ABCC1	intron_variant	protein_coding	ANN=T|intron_variant|MODIFIER|ABCC1|ABCC1|transcript|NM_004996.3|protein_coding|11/30|c.1473+1101C>T||||||
chr19_41615851_A_T	0.572561	-2.20222	0.0302343	3	50	48	69.1044	63.9783	69.9783	0.0238758	16	5	29	1	0.660616	CYP2F1;CYP2A13-CYP2F1	upstream_gene_variant;intergenic_region	protein_coding;	ANN=T|upstream_gene_variant|MODIFIER|CYP2F1|CYP2F1|transcript|NM_000774.3|protein_coding||c.-6243A>T|||||4502|,T|intergenic_region|MODIFIER|CYP2A13-CYP2F1|CYP2A13-CYP2F1|intergenic_region|CYP2A13-CYP2F1|||n.41615851A>T||||||
chr19_41617147_C_A	0.572561	-2.20222	0.0302343	3	50	48	69.1044	63.9783	69.9783	0.0238758	16	5	29	1	0.660616	CYP2F1;CYP2A13-CYP2F1	upstream_gene_variant;intergenic_region	protein_coding;	ANN=A|upstream_gene_variant|MODIFIER|CYP2F1|CYP2F1|transcript|NM_000774.3|protein_coding||c.-4947C>A|||||3206|,A|intergenic_region|MODIFIER|CYP2A13-CYP2F1|CYP2A13-CYP2F1|intergenic_region|CYP2A13-CYP2F1|||n.41617147C>A||||||
chr19_41627548_G_A	0.287682	-1.89712	0.510826	3	50	48	69.1044	64.0426	70.0426	0.0247776	15	6	28	2	0.660616	CYP2F1	intron_variant	protein_coding	ANN=A|intron_variant|MODIFIER|CYP2F1|CYP2F1|transcript|NM_000774.3|protein_coding|5/9|c.645+25G>A||||||
chr19_41627550_A_G	0.287682	-1.89712	0.510826	3	50	48	69.1044	64.0426	70.0426	0.0247776	15	6	28	2	0.660616	CYP2F1	intron_variant	protein_coding	ANN=G|intron_variant|MODIFIER|CYP2F1|CYP2F1|transcript|NM_000774.3|protein_coding|5/9|c.645+27A>G||||||
chr19_41627553_G_C	0.287682	-1.89712	0.510826	3	50	48	69.1044	64.0426	70.0426	0.0247776	15	6	28	2	0.660616	CYP2F1	intron_variant	protein_coding	ANN=C|intron_variant|MODIFIER|CYP2F1|CYP2F1|transcript|NM_000774.3|protein_coding|5/9|c.645+30G>C||||||
chr1_94533027_G_C	-0.182322	17.6229	0.518794	3	50	48	69.1044	64.0601	70.0601	0.0250293	21	0	26	4	0.660616	ABCA4	intron_variant	protein_coding	ANN=C|intron_variant|MODIFIER|ABCA4|ABCA4|transcript|NM_000350.2|protein_coding|11/49|c.1555-4154C>G||||||
chr11_34478739_T_TATTA	-0.182322	17.6229	0.518794	3	50	48	69.1044	64.0601	70.0601	0.0250293	21	0	26	4	0.660616	CAT	intron_variant	protein_coding	ANN=TATTA|intron_variant|MODIFIER|CAT|CAT|transcript|NM_001752.3|protein_coding|8/12|c.1056+378_1056+379insAATT||||||INFO_REALIGN_3_PRIME
chr12_117778702_G_T	-0.182322	17.6229	0.518794	3	50	48	69.1044	64.0601	70.0601	0.0250293	21	0	26	4	0.660616	NOS1;NOS1	intron_variant;intron_variant	protein_coding;protein_coding	ANN=T|intron_variant|MODIFIER|NOS1|NOS1|transcript|NM_001204218.1|protein_coding|1/29|c.-420-9408C>A||||||,T|intron_variant|MODIFIER|NOS1|NOS1|transcript|NM_000620.4|protein_coding|1/28|c.-420-9408C>A||||||
chr12_117778704_A_T	-0.182322	17.6229	0.518794	3	50	48	69.1044	64.0601	70.0601	0.0250293	21	0	26	4	0.660616	NOS1;NOS1	intron_variant;intron_variant	protein_coding;protein_coding	ANN=T|intron_variant|MODIFIER|NOS1|NOS1|transcript|NM_001204218.1|protein_coding|1/29|c.-420-9410T>A||||||,T|intron_variant|MODIFIER|NOS1|NOS1|transcript|NM_000620.4|protein_coding|1/28|c.-420-9410T>A||||||
chr17_21053431_A_C,AAAAC	-0.182322	17.6229	0.518794	3	50	48	69.1044	64.0601	70.0601	0.0250293	21	0	26	4	0.660616	DHRS7B;DHRS7B	intron_variant;intron_variant	protein_coding;protein_coding	ANN=C|intron_variant|MODIFIER|DHRS7B|DHRS7B|transcript|NM_015510.4|protein_coding|1/6|c.21-21900A>C||||||,AAAAC|intron_variant|MODIFIER|DHRS7B|DHRS7B|transcript|NM_015510.4|protein_coding|1/6|c.21-21897_21-21896insCAAA||||||INFO_REALIGN_3_PRIME
chr19_34136546_G_A	-0.182322	17.6229	0.518794	3	50	48	69.1044	64.0601	70.0601	0.0250293	21	0	26	4	0.660616	CHST8;CHST8	intron_variant;intron_variant	protein_coding;protein_coding	ANN=A|intron_variant|MODIFIER|CHST8|CHST8|transcript|NM_001127895.1|protein_coding|1/4|c.-163-22127G>A||||||,A|intron_variant|MODIFIER|CHST8|CHST8|transcript|NM_001127896.1|protein_coding|1/3|c.-87+23344G>A||||||
chr2_201531194_A_C	-0.182322	17.6229	0.518794	3	50	48	69.1044	64.0601	70.0601	0.0250293	21	0	26	4	0.660616	AOX1	intron_variant	protein_coding	ANN=C|intron_variant|MODIFIER|AOX1|AOX1|transcript|NM_001159.3|protein_coding|31/34|c.3544-216A>C||||||
chr22_46564230_A_G	-0.182322	17.6229	0.518794	3	50	48	69.1044	64.0601	70.0601	0.0250293	21	0	26	4	0.660616	PPARA;PPARA	intron_variant;intron_variant	protein_coding;protein_coding	ANN=G|intron_variant|MODIFIER|PPARA|PPARA|transcript|NM_001001928.2|protein_coding|2/7|c.-43+16357A>G||||||,G|intron_variant|MODIFIER|PPARA|PPARA|transcript|NM_005036.4|protein_coding|2/8|c.-126-8420A>G||||||
chr4_89025667_G_A	-0.182322	17.6229	0.518794	3	50	48	69.1044	64.0601	70.0601	0.0250293	21	0	26	4	0.660616	ABCG2;ABCG2	intron_variant;intron_variant	protein_coding;protein_coding	ANN=A|intron_variant|MODIFIER|ABCG2|ABCG2|transcript|NM_004827.2|protein_coding|10/15|c.1277+2669C>T||||||,A|intron_variant|MODIFIER|ABCG2|ABCG2|transcript|NM_001257386.1|protein_coding|10/15|c.1277+2669C>T||||||
chr4_106688044_CTTTTTTTT_CTTTTTTTTTTT,CTTTTTTTTTTTT,C	-0.182322	17.6229	0.518794	3	50	48	69.1044	64.0601	70.0601	0.0250293	21	0	26	4	0.660616	GSTCD;GSTCD;GSTCD;GSTCD;GSTCD;GSTCD	intron_variant;intron_variant;intron_variant;intron_variant;intron_variant;intron_variant	protein_coding;protein_coding;protein_coding;protein_coding;protein_coding;protein_coding	ANN=C|intron_variant|MODIFIER|GSTCD|GSTCD|transcript|NM_001031720.3|protein_coding|5/11|c.1240+37406_1240+37413delTTTTTTTT||||||INFO_REALIGN_3_PRIME,CTTTTTTTTTTT|intron_variant|MODIFIER|GSTCD|GSTCD|transcript|NM_001031720.3|protein_coding|5/11|c.1240+37411_1240+37413dupTTT||||||INFO_REALIGN_3_PRIME,CTTTTTTTTTTTT|intron_variant|MODIFIER|GSTCD|GSTCD|transcript|NM_001031720.3|protein_coding|5/11|c.1…
chr9_137287157_G_T	-0.182322	17.6229	0.518794	3	50	48	69.1044	64.0601	70.0601	0.0250293	21	0	26	4	0.660616	RXRA;RXRA	intron_variant;intron_variant	protein_coding;protein_coding	ANN=T|intron_variant|MODIFIER|RXRA|RXRA|transcript|NM_002957.5|protein_coding|1/9|c.29-6321G>T||||||,T|intron_variant|MODIFIER|RXRA|RXRA|transcript|NM_001291920.1|protein_coding|1/9|c.-53-6321G>T||||||
chr9_137291740_C_T	-0.182322	17.6229	0.518794	3	50	48	69.1044	64.0601	70.0601	0.0250293	21	0	26	4	0.660616	RXRA;RXRA	intron_variant;intron_variant	protein_coding;protein_coding	ANN=T|intron_variant|MODIFIER|RXRA|RXRA|transcript|NM_002957.5|protein_coding|1/9|c.29-1738C>T||||||,T|intron_variant|MODIFIER|RXRA|RXRA|transcript|NM_001291920.1|protein_coding|1/9|c.-53-1738C>T||||||
chrX_77261204_G_A	-0.182322	17.6229	0.518794	3	50	48	69.1044	64.0601	70.0601	0.0250293	21	0	26	4	0.660616	ATP7A;ATP7A;ATP7A	intron_variant;intron_variant;intron_variant	protein_coding;protein_coding;pseudogene	ANN=A|intron_variant|MODIFIER|ATP7A|ATP7A|transcript|NM_000052.6|protein_coding|6/22|c.1707+2471G>A||||||,A|intron_variant|MODIFIER|ATP7A|ATP7A|transcript|NM_001282224.1|protein_coding|6/21|c.1707+2471G>A||||||,A|intron_variant|MODIFIER|ATP7A|ATP7A|transcript|NR_104109.1|pseudogene|2/9|n.322-25694G>A||||||
chrX_77261214_G_A	-0.182322	17.6229	0.518794	3	50	48	69.1044	64.0601	70.0601	0.0250293	21	0	26	4	0.660616	ATP7A;ATP7A;ATP7A	intron_variant;intron_variant;intron_variant	protein_coding;protein_coding;pseudogene	ANN=A|intron_variant|MODIFIER|ATP7A|ATP7A|transcript|NM_000052.6|protein_coding|6/22|c.1707+2481G>A||||||,A|intron_variant|MODIFIER|ATP7A|ATP7A|transcript|NM_001282224.1|protein_coding|6/21|c.1707+2481G>A||||||,A|intron_variant|MODIFIER|ATP7A|ATP7A|transcript|NR_104109.1|pseudogene|2/9|n.322-25684G>A||||||
chrX_77261217_G_A	-0.182322	17.6229	0.518794	3	50	48	69.1044	64.0601	70.0601	0.0250293	21	0	26	4	0.660616	ATP7A;ATP7A;ATP7A	intron_variant;intron_variant;intron_variant	protein_coding;protein_coding;pseudogene	ANN=A|intron_variant|MODIFIER|ATP7A|ATP7A|transcript|NM_000052.6|protein_coding|6/22|c.1707+2484G>A||||||,A|intron_variant|MODIFIER|ATP7A|ATP7A|transcript|NM_001282224.1|protein_coding|6/21|c.1707+2484G>A||||||,A|intron_variant|MODIFIER|ATP7A|ATP7A|transcript|NR_104109.1|pseudogene|2/9|n.322-25681G>A||||||
chr13_95884830_C_CCT	-0.182322	17.6229	0.518794	3	50	48	69.1044	64.0601	70.0601	0.0250293	21	0	26	4	0.660616	ABCC4;ABCC4;ABCC4;ABCC4	intron_variant;intron_variant;intron_variant;intron_variant	protein_coding;protein_coding;protein_coding;protein_coding	ANN=CCT|intron_variant|MODIFIER|ABCC4|ABCC4|transcript|NM_005845.4|protein_coding|4/30|c.531+2033_531+2034insAG||||||,CCT|intron_variant|MODIFIER|ABCC4|ABCC4|transcript|NM_001301829.1|protein_coding|4/29|c.531+2033_531+2034insAG||||||,CCT|intron_variant|MODIFIER|ABCC4|ABCC4|transcript|NM_001105515.2|protein_coding|4/20|c.531+2033_531+2034insAG||||||,CCT|intron_variant|MODIFIER|ABCC4|ABCC4|transcr…
chr13_99353566_T_C	-0.182322	17.6229	0.518794	3	50	48	69.1044	64.0601	70.0601	0.0250293	21	0	26	4	0.660616	SLC15A1	intron_variant	protein_coding	ANN=C|intron_variant|MODIFIER|SLC15A1|SLC15A1|transcript|NM_005073.3|protein_coding|18/22|c.1466+1168A>G||||||
chr13_99357288_A_G	-0.182322	17.6229	0.518794	3	50	48	69.1044	64.0601	70.0601	0.0250293	21	0	26	4	0.660616	SLC15A1	intron_variant	protein_coding	ANN=G|intron_variant|MODIFIER|SLC15A1|SLC15A1|transcript|NM_005073.3|protein_coding|16/22|c.1270-599T>C||||||
chr15_51523095_A_G	-0.182322	17.6229	0.518794	3	50	48	69.1044	64.0601	70.0601	0.0250293	21	0	26	4	0.660616	CYP19A1;CYP19A1	intron_variant;intron_variant	protein_coding;protein_coding	ANN=G|intron_variant|MODIFIER|CYP19A1|CYP19A1|transcript|NM_000103.3|protein_coding|3/9|c.297-2965T>C||||||,G|intron_variant|MODIFIER|CYP19A1|CYP19A1|transcript|NM_031226.2|protein_coding|4/10|c.297-2965T>C||||||
chr19_41591907_C_T	-0.182322	17.6229	0.518794	3	50	48	69.1044	64.0601	70.0601	0.0250293	21	0	26	4	0.660616	CYP2A13;CYP2B6-CYP2A13	upstream_gene_variant;intergenic_region	protein_coding;	ANN=T|upstream_gene_variant|MODIFIER|CYP2A13|CYP2A13|transcript|NM_000766.4|protein_coding||c.-2470C>T|||||2449|,T|intergenic_region|MODIFIER|CYP2B6-CYP2A13|CYP2B6-CYP2A13|intergenic_region|CYP2B6-CYP2A13|||n.41591907C>T||||||
chr19_41594450_G_A	-0.182322	17.6229	0.518794	3	50	48	69.1044	64.0601	70.0601	0.0250293	21	0	26	4	0.660616	CYP2A13	missense_variant	protein_coding	ANN=A|missense_variant|MODERATE|CYP2A13|CYP2A13|transcript|NM_000766.4|protein_coding|1/9|c.74G>A|p.Arg25Gln|95/1760|74/1485|25/494||
chr19_41597751_C_T	-0.182322	17.6229	0.518794	3	50	48	69.1044	64.0601	70.0601	0.0250293	21	0	26	4	0.660616	CYP2A13	missense_variant	protein_coding	ANN=T|missense_variant|MODERATE|CYP2A13|CYP2A13|transcript|NM_000766.4|protein_coding|5/9|c.769C>T|p.Arg257Cys|790/1760|769/1485|257/494||
chr22_46566330_T_C	-0.182322	17.6229	0.518794	3	50	48	69.1044	64.0601	70.0601	0.0250293	21	0	26	4	0.660616	PPARA;PPARA	intron_variant;intron_variant	protein_coding;protein_coding	ANN=C|intron_variant|MODIFIER|PPARA|PPARA|transcript|NM_001001928.2|protein_coding|2/7|c.-43+18457T>C||||||,C|intron_variant|MODIFIER|PPARA|PPARA|transcript|NM_005036.4|protein_coding|2/8|c.-126-6320T>C||||||
chr4_140589100_C_T	-0.182322	17.6229	0.518794	3	50	48	69.1044	64.0601	70.0601	0.0250293	21	0	26	4	0.660616	MGST2;MGST2;MGST2;MGST2	intron_variant;intron_variant;intron_variant;intron_variant	protein_coding;protein_coding;protein_coding;protein_coding	ANN=T|intron_variant|MODIFIER|MGST2|MGST2|transcript|NM_001204366.1|protein_coding|1/5|c.58+1869C>T||||||,T|intron_variant|MODIFIER|MGST2|MGST2|transcript|NM_001204368.1|protein_coding|1/3|c.58+1869C>T||||||,T|intron_variant|MODIFIER|MGST2|MGST2|transcript|NM_002413.4|protein_coding|1/4|c.58+1869C>T||||||,T|intron_variant|MODIFIER|MGST2|MGST2|transcript|NM_001204367.1|protein_coding|1/4|c.-47+186…
chr7_75601867_G_A	-0.182322	17.6229	0.518794	3	50	48	69.1044	64.0601	70.0601	0.0250293	21	0	26	4	0.660616	POR	intron_variant	protein_coding	ANN=A|intron_variant|MODIFIER|POR|POR|transcript|NM_000941.2|protein_coding|3/15|c.237+88G>A||||||
chr7_75616577_G_A	-0.182322	17.6229	0.518794	3	50	48	69.1044	64.0601	70.0601	0.0250293	21	0	26	4	0.660616	TMEM120A;POR	synonymous_variant;downstream_gene_variant	protein_coding;protein_coding	ANN=A|synonymous_variant|LOW|TMEM120A|TMEM120A|transcript|NM_031925.2|protein_coding|12/12|c.945C>T|p.Leu315Leu|1049/1471|945/1032|315/343||,A|downstream_gene_variant|MODIFIER|POR|POR|transcript|NM_000941.2|protein_coding||c.*778G>A|||||404|
chr13_95681436_A_C,*	-0.916291	2.70805	1.29928	3	50	48	69.1044	64.078	70.078	0.0252885	20	1	24	6	0.660616	ABCC4;ABCC4	intron_variant;intron_variant	protein_coding;protein_coding	ANN=C|intron_variant|MODIFIER|ABCC4|ABCC4|transcript|NM_005845.4|protein_coding|30/30|c.3870+5423T>G||||||,C|intron_variant|MODIFIER|ABCC4|ABCC4|transcript|NM_001301829.1|protein_coding|29/29|c.3729+5423T>G||||||
chr4_69509862_T_C	-0.916291	2.70805	1.29928	3	50	48	69.1044	64.078	70.078	0.0252885	20	1	24	6	0.660616	UGT2B15;UGT2B17-UGT2B15	downstream_gene_variant;intergenic_region	protein_coding;	ANN=C|downstream_gene_variant|MODIFIER|UGT2B15|UGT2B15|transcript|NM_001076.3|protein_coding||c.*2960A>G|||||2453|,C|intergenic_region|MODIFIER|UGT2B17-UGT2B15|UGT2B17-UGT2B15|intergenic_region|UGT2B17-UGT2B15|||n.69509862T>C||||||
chr6_32806121_T_C	1.79176	-2.70805	-1.40877	3	50	48	69.1044	64.078	70.078	0.0252885	16	5	28	2	0.660616	PSMB8;PSMB8;TAP2;TAP2;TAP2	downstream_gene_variant;downstream_gene_variant;intron_variant;intron_variant;intron_variant	protein_coding;protein_coding;protein_coding;protein_coding;protein_coding	ANN=C|downstream_gene_variant|MODIFIER|PSMB8|PSMB8.3|transcript|NM_148919.3|protein_coding||c.*2615A>G|||||2373|,C|downstream_gene_variant|MODIFIER|PSMB8|PSMB8.3|transcript|NM_004159.4.6|protein_coding||c.*2615A>G|||||2373|,C|intron_variant|MODIFIER|TAP2|TAP2.2|transcript|NM_000544.3.8|protein_coding|1/11|c.-4-107A>G||||||,C|intron_variant|MODIFIER|TAP2|TAP2.2|transcript|NM_018833.2.2|protein_cod…
chr1_12629263_T_A,*	-0.916291	2.70805	1.29928	3	50	48	69.1044	64.078	70.078	0.0252885	20	1	24	6	0.660616	DHRS3	intron_variant	protein_coding	ANN=A|intron_variant|MODIFIER|DHRS3|DHRS3|transcript|NM_004753.6|protein_coding|5/5|c.825-810A>T||||||
chr15_92706785_TTA_T,*	1.79176	-2.70805	-1.40877	3	50	48	69.1044	64.078	70.078	0.0252885	16	5	28	2	0.660616	SLCO3A1;SLCO3A1	3_prime_UTR_variant;intron_variant	protein_coding;protein_coding	ANN=T|3_prime_UTR_variant|MODIFIER|SLCO3A1|SLCO3A1|transcript|NM_013272.3|protein_coding|10/10|c.*421_*422delTA|||||421|,T|intron_variant|MODIFIER|SLCO3A1|SLCO3A1|transcript|NM_001145044.1|protein_coding|10/10|c.1996+558_1996+559delTA||||||
chr16_87864751_AAC_A	1.00559	-1.93956	-0.474556	3	50	48	69.1044	64.2011	70.2011	0.0271553	15	6	28	2	0.660616	SLC7A5;MIR6775	3_prime_UTR_variant;downstream_gene_variant	protein_coding;pseudogene	ANN=A|3_prime_UTR_variant|MODIFIER|SLC7A5|SLC7A5|transcript|NM_003486.5|protein_coding|10/10|c.*1823_*1824delGT|||||1823|,A|downstream_gene_variant|MODIFIER|MIR6775|MIR6775|transcript|NR_106833.1|pseudogene||n.*3445_*3446delGT|||||3446|
chr14_24760009_G_A	-0.344197	1.32903	0.273989	3	50	48	69.1044	64.3436	70.3436	0.0294971	16	5	14	16	0.660616	DHRS1;DHRS1	3_prime_UTR_variant;3_prime_UTR_variant	protein_coding;protein_coding	ANN=A|3_prime_UTR_variant|MODIFIER|DHRS1|DHRS1|transcript|NM_001136050.2|protein_coding|9/9|c.*56C>T|||||56|,A|3_prime_UTR_variant|MODIFIER|DHRS1|DHRS1|transcript|NM_138452.2|protein_coding|9/9|c.*56C>T|||||56|
chr14_23282449_C_T	2.19565	-2.01047	-0.13002	3	50	48	69.1044	64.3689	70.3689	0.029934	1	20	8	22	0.660616	SLC7A7;SLC7A7;SLC7A7	synonymous_variant;synonymous_variant;non_coding_exon_variant	protein_coding;protein_coding;pseudogene	ANN=T|synonymous_variant|LOW|SLC7A7|SLC7A7|transcript|NM_001126105.2|protein_coding|3/11|c.159G>A|p.Ser53Ser|401/2165|159/1536|53/511||,T|synonymous_variant|LOW|SLC7A7|SLC7A7|transcript|NM_001126106.2|protein_coding|3/11|c.159G>A|p.Ser53Ser|507/2271|159/1536|53/511||,T|non_coding_exon_variant|MODIFIER|SLC7A7|SLC7A7|transcript|NR_040448.1|pseudogene|2/10|n.774G>A||||||
chr10_135352692_TTTTTG_T,*	-1.6897e-15	17.4248	0.287682	3	50	48	69.1044	64.4391	70.4391	0.0311827	21	0	26	4	0.660616	CYP2E1;CYP2E1-SYCE1	downstream_gene_variant;intergenic_region	protein_coding;	ANN=T|downstream_gene_variant|MODIFIER|CYP2E1|CYP2E1|transcript|NM_000773.3|protein_coding||c.*225_*229delTTTTG|||||73|,T|intergenic_region|MODIFIER|CYP2E1-SYCE1|CYP2E1-SYCE1|intergenic_region|CYP2E1-SYCE1|||n.135352693_135352697delTTTTG||||||
chr12_21527753_G_GTCTCTC	-1.66211e-15	17.4248	0.287682	3	50	48	69.1044	64.4391	70.4391	0.0311827	21	0	26	4	0.660616	IAPP;SLCO1A2	intron_variant;intron_variant	protein_coding;protein_coding	ANN=GTCTCTC|intron_variant|MODIFIER|IAPP|IAPP|transcript|NM_000415.2|protein_coding|2/2|c.80+1404_80+1409dupCTCTCT||||||INFO_REALIGN_3_PRIME,GTCTCTC|intron_variant|MODIFIER|SLCO1A2|SLCO1A2|transcript|NM_134431.3|protein_coding|1/15|c.-189-300_-189-295dupGAGAGA||||||
chr13_95669276_C_CAAAA,CAAAAA,CAAA	-1.29583e-15	17.4248	0.287682	3	50	48	69.1044	64.4391	70.4391	0.0311827	21	0	26	4	0.660616	ABCC4;ABCC4;ABCC4;ABCC4;ABCC4;ABCC4;LINC00557-ABCC4;LINC00557-ABCC4;LINC00557-ABCC4	downstream_gene_variant;downstream_gene_variant;downstream_gene_variant;downstream_gene_variant;downstream_gene_variant;downstream_gene_variant;intergenic_region;intergenic_region;intergenic_region	protein_coding;protein_coding;protein_coding;protein_coding;protein_coding;protein_coding;;;	ANN=CAAAA|downstream_gene_variant|MODIFIER|ABCC4|ABCC4|transcript|NM_005845.4|protein_coding||c.*4552_*4553insTTTT|||||2806|,CAAAAA|downstream_gene_variant|MODIFIER|ABCC4|ABCC4|transcript|NM_005845.4|protein_coding||c.*4552_*4553insTTTTT|||||2806|,CAAA|downstream_gene_variant|MODIFIER|ABCC4|ABCC4|transcript|NM_005845.4|protein_coding||c.*4552_*4553insTTT|||||2806|,CAAAA|downstream_gene_variant|MO…
chr13_95669302_G_A	-1.29583e-15	17.4248	0.287682	3	50	48	69.1044	64.4391	70.4391	0.0311827	21	0	26	4	0.660616	ABCC4;ABCC4;LINC00557-ABCC4	downstream_gene_variant;downstream_gene_variant;intergenic_region	protein_coding;protein_coding;	ANN=A|downstream_gene_variant|MODIFIER|ABCC4|ABCC4|transcript|NM_005845.4|protein_coding||c.*4527C>T|||||2781|,A|downstream_gene_variant|MODIFIER|ABCC4|ABCC4|transcript|NM_001301829.1|protein_coding||c.*4527C>T|||||2781|,A|intergenic_region|MODIFIER|LINC00557-ABCC4|LINC00557-ABCC4|intergenic_region|LINC00557-ABCC4|||n.95669302G>A||||||
chr4_89054512_G_A	1.04701e-15	17.4248	0.287682	3	50	48	69.1044	64.4391	70.4391	0.0311827	21	0	26	4	0.660616	ABCG2;ABCG2	intron_variant;intron_variant	protein_coding;protein_coding	ANN=A|intron_variant|MODIFIER|ABCG2|ABCG2|transcript|NM_004827.2|protein_coding|2/15|c.204-725C>T||||||,A|intron_variant|MODIFIER|ABCG2|ABCG2|transcript|NM_001257386.1|protein_coding|2/15|c.204-725C>T||||||
chr4_106641320_CTCTG_C	-1.61319e-16	17.4248	0.287682	3	50	48	69.1044	64.4391	70.4391	0.0311827	21	0	26	4	0.660616	GSTCD;GSTCD	intron_variant;intron_variant	protein_coding;protein_coding	ANN=C|intron_variant|MODIFIER|GSTCD|GSTCD|transcript|NM_001031720.3|protein_coding|3/11|c.894+644_894+647delGTCT||||||INFO_REALIGN_3_PRIME,C|intron_variant|MODIFIER|GSTCD|GSTCD|transcript|NM_024751.3|protein_coding|3/11|c.633+644_633+647delGTCT||||||INFO_REALIGN_3_PRIME
chr7_122814024_G_GT	1.27421e-15	17.4248	0.287682	3	50	48	69.1044	64.4391	70.4391	0.0311827	21	0	26	4	0.660616	SLC13A1	intron_variant	protein_coding	ANN=GT|intron_variant|MODIFIER|SLC13A1|SLC13A1|transcript|NM_022444.3|protein_coding|2/14|c.229-2067dupA||||||
chr8_18054828_C_T	1.60186e-16	17.4248	0.287682	3	50	48	69.1044	64.4391	70.4391	0.0311827	21	0	26	4	0.660616	NAT1;NAT1	intron_variant;intron_variant	protein_coding;protein_coding	ANN=T|intron_variant|MODIFIER|NAT1|NAT1|transcript|NM_001160179.2|protein_coding|2/4|c.-260-12462C>T||||||,T|intron_variant|MODIFIER|NAT1|NAT1|transcript|NM_001291962.1|protein_coding|2/5|c.-192-12462C>T||||||
chr1_94469821_C_T	-9.17728e-16	17.4248	0.287682	3	50	48	69.1044	64.4391	70.4391	0.0311827	21	0	26	4	0.660616	ABCA4	intron_variant	protein_coding	ANN=T|intron_variant|MODIFIER|ABCA4|ABCA4|transcript|NM_000350.2|protein_coding|44/49|c.6147+1176G>A||||||
chr1_98276110_G_A	-1.19793e-15	17.4248	0.287682	3	50	48	69.1044	64.4391	70.4391	0.0311827	21	0	26	4	0.660616	DPYD;DPYD	intron_variant;intron_variant	protein_coding;protein_coding	ANN=A|intron_variant|MODIFIER|DPYD|DPYD|transcript|NM_000110.3|protein_coding|3/22|c.233+17560C>T||||||,A|intron_variant|MODIFIER|DPYD|DPYD|transcript|NM_001160301.1|protein_coding|3/5|c.233+17560C>T||||||
chr10_73757440_A_AT,ATTT	-1.95295e-15	17.4248	0.287682	3	50	48	69.1044	64.4391	70.4391	0.0311827	21	0	26	4	0.660616	CHST3;CHST3	intron_variant;intron_variant	protein_coding;protein_coding	ANN=AT|intron_variant|MODIFIER|CHST3|CHST3|transcript|NM_004273.4|protein_coding|1/2|c.-107-8035dupT||||||INFO_REALIGN_3_PRIME,ATTT|intron_variant|MODIFIER|CHST3|CHST3|transcript|NM_004273.4|protein_coding|1/2|c.-107-8037_-107-8035dupTTT||||||INFO_REALIGN_3_PRIME
chr12_21961726_A_G	-1.62966e-15	17.4248	0.287682	3	50	48	69.1044	64.4391	70.4391	0.0311827	21	0	26	4	0.660616	ABCC9;ABCC9	intron_variant;intron_variant	protein_coding;protein_coding	ANN=G|intron_variant|MODIFIER|ABCC9|ABCC9|transcript|NM_005691.3|protein_coding|35/37|c.4315+1060T>C||||||,G|intron_variant|MODIFIER|ABCC9|ABCC9|transcript|NM_020297.3|protein_coding|35/37|c.4315+1060T>C||||||
chr12_22004281_C_T	-1.62966e-15	17.4248	0.287682	3	50	48	69.1044	64.4391	70.4391	0.0311827	21	0	26	4	0.660616	ABCC9;ABCC9	intron_variant;intron_variant	protein_coding;protein_coding	ANN=T|intron_variant|MODIFIER|ABCC9|ABCC9|transcript|NM_005691.3|protein_coding|22/37|c.2769+750G>A||||||,T|intron_variant|MODIFIER|ABCC9|ABCC9|transcript|NM_020297.3|protein_coding|22/37|c.2769+750G>A||||||
chr12_104913221_C_T	-8.44778e-16	17.4248	0.287682	3	50	48	69.1044	64.4391	70.4391	0.0311827	21	0	26	4	0.660616	CHST11;CHST11	intron_variant;intron_variant	protein_coding;protein_coding	ANN=T|intron_variant|MODIFIER|CHST11|CHST11|transcript|NM_018413.5|protein_coding|1/2|c.118+61914C>T||||||,T|intron_variant|MODIFIER|CHST11|CHST11|transcript|NM_001173982.1|protein_coding|1/2|c.103+61929C>T||||||
chr14_23635352_CG_C	-1.40045e-15	17.4248	0.287682	3	50	48	69.1044	64.4391	70.4391	0.0311827	21	0	26	4	0.660616	SLC7A8	intron_variant	protein_coding	ANN=C|intron_variant|MODIFIER|SLC7A8|SLC7A8|transcript|NM_012244.3|protein_coding|2/10|c.356+192delC||||||
chr14_23635369_T_C	-1.40045e-15	17.4248	0.287682	3	50	48	69.1044	64.4391	70.4391	0.0311827	21	0	26	4	0.660616	SLC7A8	intron_variant	protein_coding	ANN=C|intron_variant|MODIFIER|SLC7A8|SLC7A8|transcript|NM_012244.3|protein_coding|2/10|c.356+176A>G||||||
chr14_24518852_T_C	-1.20504e-15	17.4248	0.287682	3	50	48	69.1044	64.4391	70.4391	0.0311827	21	0	26	4	0.660616	LRRC16B;DHRS4L1;DHRS4L1;DHRS4L1;DHRS4L1;DHRS4L1;DHRS4L1;DHRS4L1;DHRS4L1	upstream_gene_variant;intron_variant;intron_variant;intron_variant;intron_variant;intron_variant;intron_variant;intron_variant;intron_variant	protein_coding;protein_coding;pseudogene;pseudogene;pseudogene;pseudogene;pseudogene;pseudogene;pseudogene	ANN=C|upstream_gene_variant|MODIFIER|LRRC16B|LRRC16B|transcript|NM_138360.3|protein_coding||c.-2511T>C|||||2354|,C|intron_variant|MODIFIER|DHRS4L1|DHRS4L1|transcript|NM_001277864.1|protein_coding|4/4|c.338+303T>C||||||,C|intron_variant|MODIFIER|DHRS4L1|DHRS4L1|transcript|NR_102687.1|pseudogene|3/3|n.644+303T>C||||||,C|intron_variant|MODIFIER|DHRS4L1|DHRS4L1|transcript|NR_102688.1|pseudogene|4/4|n…
chr16_71565951_G_GT,GTT	-1.17273e-15	17.4248	0.287682	3	50	48	69.1044	64.4391	70.4391	0.0311827	21	0	26	4	0.660616	CHST4;CHST4;CHST4;CHST4	intron_variant;intron_variant;intron_variant;intron_variant	protein_coding;protein_coding;protein_coding;protein_coding	ANN=GT|intron_variant|MODIFIER|CHST4|CHST4|transcript|NM_001166395.1|protein_coding|1/1|c.-18-4595dupT||||||INFO_REALIGN_3_PRIME,GTT|intron_variant|MODIFIER|CHST4|CHST4|transcript|NM_001166395.1|protein_coding|1/1|c.-18-4596_-18-4595dupTT||||||INFO_REALIGN_3_PRIME,GT|intron_variant|MODIFIER|CHST4|CHST4|transcript|NM_005769.2|protein_coding|1/1|c.-18-4595dupT||||||INFO_REALIGN_3_PRIME,GTT|intron_v…
chr16_75560050_TGTGTGCATGTGA_TGTGTGCATGTGAGTGTGCATGTGA,TGTGTGCATGTGAGTGTGCATGTGAGTGTGCATGTGA,T	6.82187e-17	17.4248	0.287682	3	50	48	69.1044	64.4391	70.4391	0.0311827	21	0	26	4	0.660616	CHST5;CHST5;CHST5;CHST6-CHST5;CHST6-CHST5;CHST6-CHST5	downstream_gene_variant;downstream_gene_variant;downstream_gene_variant;intergenic_region;intergenic_region;intergenic_region	protein_coding;protein_coding;protein_coding;;;	ANN=T|downstream_gene_variant|MODIFIER|CHST5|CHST5|transcript|NM_024533.4|protein_coding||c.*2985_*2996delTCACATGCACAC|||||2377|,TGTGTGCATGTGAGTGTGCATGTGA|downstream_gene_variant|MODIFIER|CHST5|CHST5|transcript|NM_024533.4|protein_coding||c.*2984_*2985insTCACATGCACAC|||||2365|,TGTGTGCATGTGAGTGTGCATGTGAGTGTGCATGTGA|downstream_gene_variant|MODIFIER|CHST5|CHST5|transcript|NM_024533.4|protein_coding|…
chr19_15802534_G_T	-5.24258e-16	17.4248	0.287682	3	50	48	69.1044	64.4391	70.4391	0.0311827	21	0	26	4	0.660616	CYP4F12;CYP4F12	intron_variant;intron_variant	protein_coding;pseudogene	ANN=T|intron_variant|MODIFIER|CYP4F12|CYP4F12|transcript|NM_023944.3|protein_coding|9/12|c.1116-4212G>T||||||,T|intron_variant|MODIFIER|CYP4F12|CYP4F12|transcript|NR_117085.1|pseudogene|8/10|n.1253-4212G>T||||||
chr19_41382476_T_A	3.94044e-16	17.4248	0.287682	3	50	48	69.1044	64.4391	70.4391	0.0311827	21	0	26	4	0.660616	CYP2A7;CYP2A7	missense_variant;missense_variant	protein_coding;protein_coding	ANN=A|missense_variant|MODERATE|CYP2A7|CYP2A7|transcript|NM_000764.2|protein_coding|8/9|c.1259A>T|p.Lys420Met|1801/2281|1259/1485|420/494||,A|missense_variant|MODERATE|CYP2A7|CYP2A7|transcript|NM_030589.2|protein_coding|7/8|c.1106A>T|p.Lys369Met|1648/2128|1106/1332|369/443||
chr19_41384578_G_C	3.94044e-16	17.4248	0.287682	3	50	48	69.1044	64.4391	70.4391	0.0311827	21	0	26	4	0.660616	CYP2A7;CYP2A7	intron_variant;intron_variant	protein_coding;protein_coding	ANN=C|intron_variant|MODIFIER|CYP2A7|CYP2A7|transcript|NM_000764.2|protein_coding|5/8|c.831+87C>G||||||,C|intron_variant|MODIFIER|CYP2A7|CYP2A7|transcript|NM_030589.2|protein_coding|4/7|c.678+87C>G||||||
chr21_37504105_G_T	3.61941e-16	17.4248	0.287682	3	50	48	69.1044	64.4391	70.4391	0.0311827	21	0	26	4	0.660616	CBR3;CBR3-AS1;CBR3-AS1	upstream_gene_variant;non_coding_exon_variant;non_coding_exon_variant	protein_coding;pseudogene;pseudogene	ANN=T|upstream_gene_variant|MODIFIER|CBR3|CBR3|transcript|NM_001236.3|protein_coding||c.-3386G>T|||||3158|,T|non_coding_exon_variant|MODIFIER|CBR3-AS1|CBR3-AS1|transcript|NR_038892.1|pseudogene|4/4|n.1535C>A||||||,T|non_coding_exon_variant|MODIFIER|CBR3-AS1|CBR3-AS1|transcript|NR_038893.1|pseudogene|3/3|n.1460C>A||||||
chr21_37510435_T_A	3.61941e-16	17.4248	0.287682	3	50	48	69.1044	64.4391	70.4391	0.0311827	21	0	26	4	0.660616	CBR3-AS1;CBR3-AS1;CBR3;CBR3-AS1	downstream_gene_variant;intron_variant;intron_variant;intron_variant	pseudogene;pseudogene;protein_coding;pseudogene	ANN=A|downstream_gene_variant|MODIFIER|CBR3-AS1|CBR3-AS1|transcript|NR_038894.1|pseudogene||n.*3259A>T|||||3259|,A|intron_variant|MODIFIER|CBR3-AS1|CBR3-AS1|transcript|NR_038892.1|pseudogene|2/3|n.193-4376A>T||||||,A|intron_variant|MODIFIER|CBR3|CBR3|transcript|NM_001236.3|protein_coding|2/2|c.397+205T>A||||||,A|intron_variant|MODIFIER|CBR3-AS1|CBR3-AS1|transcript|NR_038893.1|pseudogene|2/2|n.193…
chr21_37511706_G_A	3.61941e-16	17.4248	0.287682	3	50	48	69.1044	64.4391	70.4391	0.0311827	21	0	26	4	0.660616	CBR3-AS1;CBR3-AS1;CBR3;CBR3-AS1	downstream_gene_variant;intron_variant;intron_variant;intron_variant	pseudogene;pseudogene;protein_coding;pseudogene	ANN=A|downstream_gene_variant|MODIFIER|CBR3-AS1|CBR3-AS1|transcript|NR_038894.1|pseudogene||n.*1988C>T|||||1988|,A|intron_variant|MODIFIER|CBR3-AS1|CBR3-AS1|transcript|NR_038892.1|pseudogene|2/3|n.193-5647C>T||||||,A|intron_variant|MODIFIER|CBR3|CBR3|transcript|NM_001236.3|protein_coding|2/2|c.397+1476G>A||||||,A|intron_variant|MODIFIER|CBR3-AS1|CBR3-AS1|transcript|NR_038893.1|pseudogene|2/2|n.19…
chr21_37513199_G_A	3.61941e-16	17.4248	0.287682	3	50	48	69.1044	64.4391	70.4391	0.0311827	21	0	26	4	0.660616	CBR3-AS1;CBR3-AS1;CBR3;CBR3-AS1	downstream_gene_variant;intron_variant;intron_variant;intron_variant	pseudogene;pseudogene;protein_coding;pseudogene	ANN=A|downstream_gene_variant|MODIFIER|CBR3-AS1|CBR3-AS1|transcript|NR_038894.1|pseudogene||n.*495C>T|||||495|,A|intron_variant|MODIFIER|CBR3-AS1|CBR3-AS1|transcript|NR_038892.1|pseudogene|2/3|n.192+5355C>T||||||,A|intron_variant|MODIFIER|CBR3|CBR3|transcript|NM_001236.3|protein_coding|2/2|c.397+2969G>A||||||,A|intron_variant|MODIFIER|CBR3-AS1|CBR3-AS1|transcript|NR_038893.1|pseudogene|2/2|n.192+…
chr21_37517385_G_C	3.61941e-16	17.4248	0.287682	3	50	48	69.1044	64.4391	70.4391	0.0311827	21	0	26	4	0.660616	CBR3-AS1;CBR3;CBR3-AS1;CBR3-AS1	intron_variant;intron_variant;intron_variant;intron_variant	pseudogene;protein_coding;pseudogene;pseudogene	ANN=C|intron_variant|MODIFIER|CBR3-AS1|CBR3-AS1|transcript|NR_038892.1|pseudogene|2/3|n.192+1169C>G||||||,C|intron_variant|MODIFIER|CBR3|CBR3|transcript|NM_001236.3|protein_coding|2/2|c.398-989G>C||||||,C|intron_variant|MODIFIER|CBR3-AS1|CBR3-AS1|transcript|NR_038893.1|pseudogene|2/2|n.192+1169C>G||||||,C|intron_variant|MODIFIER|CBR3-AS1|CBR3-AS1|transcript|NR_038894.1|pseudogene|2/2|n.192+1169C>…
chr21_37519699_C_T	3.61941e-16	17.4248	0.287682	3	50	48	69.1044	64.4391	70.4391	0.0311827	21	0	26	4	0.660616	CBR3;CBR3-AS1;CBR3-AS1;CBR3-AS1	downstream_gene_variant;intron_variant;intron_variant;intron_variant	protein_coding;pseudogene;pseudogene;pseudogene	ANN=T|downstream_gene_variant|MODIFIER|CBR3|CBR3|transcript|NM_001236.3|protein_coding||c.*889C>T|||||839|,T|intron_variant|MODIFIER|CBR3-AS1|CBR3-AS1|transcript|NR_038892.1|pseudogene|1/3|n.93-1046G>A||||||,T|intron_variant|MODIFIER|CBR3-AS1|CBR3-AS1|transcript|NR_038893.1|pseudogene|1/2|n.93-1046G>A||||||,T|intron_variant|MODIFIER|CBR3-AS1|CBR3-AS1|transcript|NR_038894.1|pseudogene|1/2|n.93-104…
chr21_37522735_T_G	3.61941e-16	17.4248	0.287682	3	50	48	69.1044	64.4391	70.4391	0.0311827	21	0	26	4	0.660616	CBR3;CBR3-AS1;CBR3-AS1;CBR3-AS1	downstream_gene_variant;intron_variant;intron_variant;intron_variant	protein_coding;pseudogene;pseudogene;pseudogene	ANN=G|downstream_gene_variant|MODIFIER|CBR3|CBR3|transcript|NM_001236.3|protein_coding||c.*3925T>G|||||3875|,G|intron_variant|MODIFIER|CBR3-AS1|CBR3-AS1|transcript|NR_038892.1|pseudogene|1/3|n.93-4082A>C||||||,G|intron_variant|MODIFIER|CBR3-AS1|CBR3-AS1|transcript|NR_038893.1|pseudogene|1/2|n.93-4082A>C||||||,G|intron_variant|MODIFIER|CBR3-AS1|CBR3-AS1|transcript|NR_038894.1|pseudogene|1/2|n.93-4…
chr22_46573109_A_AAAAAT	-1.00372e-15	17.4248	0.287682	3	50	48	69.1044	64.4391	70.4391	0.0311827	21	0	26	4	0.660616	PPARA;PPARA	intron_variant;intron_variant	protein_coding;protein_coding	ANN=AAAAAT|intron_variant|MODIFIER|PPARA|PPARA|transcript|NM_001001928.2|protein_coding|2/7|c.-42-21110_-42-21106dupTAAAA||||||INFO_REALIGN_3_PRIME,AAAAAT|intron_variant|MODIFIER|PPARA|PPARA|transcript|NM_005036.4|protein_coding|3/8|c.-43+396_-43+400dupTAAAA||||||INFO_REALIGN_3_PRIME
chr3_133733731_T_A	-2.63333e-17	17.4248	0.287682	3	50	48	69.1044	64.4391	70.4391	0.0311827	21	0	26	4	0.660616	SLCO2A1	intron_variant	protein_coding	ANN=A|intron_variant|MODIFIER|SLCO2A1|SLCO2A1|transcript|NM_005630.2|protein_coding|1/13|c.96+14820A>T||||||
chr4_88283505_C_T	-2.08143e-15	17.4248	0.287682	3	50	48	69.1044	64.4391	70.4391	0.0311827	21	0	26	4	0.660616	HSD17B11	intron_variant	protein_coding	ANN=T|intron_variant|MODIFIER|HSD17B11|HSD17B11|transcript|NM_016245.4|protein_coding|4/6|c.558-4937G>A||||||
chr4_89100228_TG_T	-1.07047e-15	17.4248	0.287682	3	50	48	69.1044	64.4391	70.4391	0.0311827	21	0	26	4	0.660616	ABCG2	intron_variant	protein_coding	ANN=T|intron_variant|MODIFIER|ABCG2|ABCG2|transcript|NM_001257386.1|protein_coding|1/15|c.-19-39063delC||||||
chr4_140619978_C_CT	-1.203e-15	17.4248	0.287682	3	50	48	69.1044	64.4391	70.4391	0.0311827	21	0	26	4	0.660616	MGST2;MGST2;MGST2;MGST2	intron_variant;intron_variant;intron_variant;intron_variant	protein_coding;protein_coding;protein_coding;protein_coding	ANN=CT|intron_variant|MODIFIER|MGST2|MGST2|transcript|NM_001204366.1|protein_coding|3/5|c.229+3569dupT||||||INFO_REALIGN_3_PRIME,CT|intron_variant|MODIFIER|MGST2|MGST2|transcript|NM_001204368.1|protein_coding|2/3|c.159-4619dupT||||||INFO_REALIGN_3_PRIME,CT|intron_variant|MODIFIER|MGST2|MGST2|transcript|NM_002413.4|protein_coding|3/4|c.229+3569dupT||||||INFO_REALIGN_3_PRIME,CT|intron_variant|MODIF…
chr7_150724353_C_CACCACTCCCTAATCTCAA	-1.17253e-15	17.4248	0.287682	3	50	48	69.1044	64.4391	70.4391	0.0311827	21	0	26	4	0.660616	ATG9B;ABCB8;ATG9B;ATG9B;ATG9B;ABCB8;ABCB8;ABCB8;ATG9B-ABCB8	upstream_gene_variant;upstream_gene_variant;upstream_gene_variant;upstream_gene_variant;upstream_gene_variant;upstream_gene_variant;upstream_gene_variant;upstream_gene_variant;intergenic_region	protein_coding;protein_coding;protein_coding;pseudogene;pseudogene;protein_coding;protein_coding;protein_coding;	ANN=CACCACTCCCTAATCTCAA|upstream_gene_variant|MODIFIER|ATG9B|ATG9B|transcript|NM_001317056.1|protein_coding||c.-2844_-2843insTTGAGATTAGGGAGTGGT|||||2768|,CACCACTCCCTAATCTCAA|upstream_gene_variant|MODIFIER|ABCB8|ABCB8|transcript|NM_001282291.1|protein_coding||c.-1250_-1249insACCACTCCCTAATCTCAA|||||1155|,CACCACTCCCTAATCTCAA|upstream_gene_variant|MODIFIER|ATG9B|ATG9B|transcript|NM_173681.5|protein_c…
chr8_70457336_C_T	4.85174e-16	17.4248	0.287682	3	50	48	69.1044	64.4391	70.4391	0.0311827	21	0	26	4	0.660616	SULF1;SULF1;SULF1;SULF1	intron_variant;intron_variant;intron_variant;intron_variant	protein_coding;protein_coding;protein_coding;protein_coding	ANN=T|intron_variant|MODIFIER|SULF1|SULF1|transcript|NM_001128204.1|protein_coding|2/21|c.-133-18438C>T||||||,T|intron_variant|MODIFIER|SULF1|SULF1|transcript|NM_015170.2|protein_coding|3/22|c.-133-18438C>T||||||,T|intron_variant|MODIFIER|SULF1|SULF1|transcript|NM_001128205.1|protein_coding|3/22|c.-133-18438C>T||||||,T|intron_variant|MODIFIER|SULF1|SULF1|transcript|NM_001128206.1|protein_coding|2…
chr8_70666083_T_TA	-1.06923e-15	17.4248	0.287682	3	50	48	69.1044	64.4391	70.4391	0.0311827	21	0	26	4	0.660616	SLCO5A1;SLCO5A1;SLCO5A1	intron_variant;intron_variant;intron_variant	protein_coding;protein_coding;protein_coding	ANN=TA|intron_variant|MODIFIER|SLCO5A1|SLCO5A1|transcript|NM_030958.2|protein_coding|4/9|c.1258+1575dupT||||||,TA|intron_variant|MODIFIER|SLCO5A1|SLCO5A1|transcript|NM_001146009.1|protein_coding|3/7|c.1258+1575dupT||||||,TA|intron_variant|MODIFIER|SLCO5A1|SLCO5A1|transcript|NM_001146008.1|protein_coding|3/7|c.1258+1575dupT||||||
chr8_70674452_T_C	-1.06923e-15	17.4248	0.287682	3	50	48	69.1044	64.4391	70.4391	0.0311827	21	0	26	4	0.660616	SLCO5A1;SLCO5A1;SLCO5A1	intron_variant;intron_variant;intron_variant	protein_coding;protein_coding;protein_coding	ANN=C|intron_variant|MODIFIER|SLCO5A1|SLCO5A1|transcript|NM_030958.2|protein_coding|2/9|c.908-342A>G||||||,C|intron_variant|MODIFIER|SLCO5A1|SLCO5A1|transcript|NM_001146009.1|protein_coding|1/7|c.908-342A>G||||||,C|intron_variant|MODIFIER|SLCO5A1|SLCO5A1|transcript|NM_001146008.1|protein_coding|1/7|c.908-342A>G||||||
chr9_38399953_A_T	2.64215e-16	17.4248	0.287682	3	50	48	69.1044	64.4391	70.4391	0.0311827	21	0	26	4	0.660616	ALDH1B1;ALDH1B1-IGFBPL1	downstream_gene_variant;intergenic_region	protein_coding;	ANN=T|downstream_gene_variant|MODIFIER|ALDH1B1|ALDH1B1|transcript|NM_000692.4|protein_coding||c.*2654A>T|||||1291|,T|intergenic_region|MODIFIER|ALDH1B1-IGFBPL1|ALDH1B1-IGFBPL1|intergenic_region|ALDH1B1-IGFBPL1|||n.38399953A>T||||||
chr9_137309953_G_A	-1.53072e-15	17.4248	0.287682	3	50	48	69.1044	64.4391	70.4391	0.0311827	21	0	26	4	0.660616	RXRA;RXRA;RXRA	intron_variant;intron_variant;intron_variant	protein_coding;protein_coding;protein_coding	ANN=A|intron_variant|MODIFIER|RXRA|RXRA|transcript|NM_002957.5|protein_coding|5/9|c.780+780G>A||||||,A|intron_variant|MODIFIER|RXRA|RXRA|transcript|NM_001291920.1|protein_coding|5/9|c.699+780G>A||||||,A|intron_variant|MODIFIER|RXRA|RXRA|transcript|NM_001291921.1|protein_coding|4/8|c.489+780G>A||||||
chr9_137309959_C_T	-1.53072e-15	17.4248	0.287682	3	50	48	69.1044	64.4391	70.4391	0.0311827	21	0	26	4	0.660616	RXRA;RXRA;RXRA	intron_variant;intron_variant;intron_variant	protein_coding;protein_coding;protein_coding	ANN=T|intron_variant|MODIFIER|RXRA|RXRA|transcript|NM_002957.5|protein_coding|5/9|c.780+786C>T||||||,T|intron_variant|MODIFIER|RXRA|RXRA|transcript|NM_001291920.1|protein_coding|5/9|c.699+786C>T||||||,T|intron_variant|MODIFIER|RXRA|RXRA|transcript|NM_001291921.1|protein_coding|4/8|c.489+786C>T||||||
chr15_85451852_T_C	-0.373568	1.39462	0.396068	3	50	48	69.1044	64.4551	70.4551	0.0314753	17	4	16	14	0.660616	SLC28A1;SLC28A1;SLC28A1	intron_variant;intron_variant;intron_variant	protein_coding;protein_coding;protein_coding	ANN=C|intron_variant|MODIFIER|SLC28A1|SLC28A1|transcript|NM_001287762.1|protein_coding|7/17|c.718-97T>C||||||,C|intron_variant|MODIFIER|SLC28A1|SLC28A1|transcript|NM_001287761.1|protein_coding|7/14|c.718-97T>C||||||,C|intron_variant|MODIFIER|SLC28A1|SLC28A1|transcript|NM_004213.4|protein_coding|8/18|c.718-97T>C||||||
chr1_97613806_GT_G	1.25276	-2.63906	-0.869771	3	50	48	69.1044	64.4993	70.4993	0.0322965	17	4	29	1	0.660616	DPYD;DPYD-AS1	intron_variant;intron_variant	protein_coding;pseudogene	ANN=G|intron_variant|MODIFIER|DPYD|DPYD|transcript|NM_000110.3|protein_coding|20/22|c.2622+44818delA||||||,G|intron_variant|MODIFIER|DPYD-AS1|DPYD-AS1|transcript|NR_046590.1|pseudogene|1/4|n.64+52265delT||||||
chr1_146663014_C_T	1.25276	-2.63906	-0.869771	3	50	48	69.1044	64.4993	70.4993	0.0322965	17	4	29	1	0.660616	FMO5;FMO5;FMO5	intron_variant;intron_variant;intron_variant	protein_coding;protein_coding;protein_coding	ANN=T|intron_variant|MODIFIER|FMO5|FMO5|transcript|NM_001461.3|protein_coding|7/8|c.1184-1186G>A||||||,T|intron_variant|MODIFIER|FMO5|FMO5|transcript|NM_001144829.2|protein_coding|7/8|c.1184-1186G>A||||||,T|intron_variant|MODIFIER|FMO5|FMO5|transcript|NM_001144830.2|protein_coding|5/6|c.831-1186G>A||||||
chr1_171306323_C_T	1.25276	-2.63906	-0.869771	3	50	48	69.1044	64.4993	70.4993	0.0322965	17	4	29	1	0.660616	TOP1P1;FMO4	upstream_gene_variant;intron_variant	pseudogene;protein_coding	ANN=T|upstream_gene_variant|MODIFIER|TOP1P1|TOP1P1|transcript|NR_002719.2|pseudogene||n.-1712C>T|||||1712|,T|intron_variant|MODIFIER|FMO4|FMO4|transcript|NM_002022.2|protein_coding|8/9|c.1181-172C>T||||||
chr17_21041414_T_C	1.25276	-2.63906	-0.869771	3	50	48	69.1044	64.4993	70.4993	0.0322965	17	4	29	1	0.660616	DHRS7B	intron_variant	protein_coding	ANN=C|intron_variant|MODIFIER|DHRS7B|DHRS7B|transcript|NM_015510.4|protein_coding|1/6|c.20+11110T>C||||||
chr19_17613147_T_TTTTTTG,*	1.25276	-2.63906	-0.869771	3	50	48	69.1044	64.4993	70.4993	0.0322965	17	4	29	1	0.660616	SLC27A1	intron_variant	protein_coding	ANN=TTTTTTG|intron_variant|MODIFIER|SLC27A1|SLC27A1|transcript|NM_198580.2|protein_coding|11/11|c.1783+925_1783+930dupGTTTTT||||||INFO_REALIGN_3_PRIME
chr2_201532166_T_C,TCCCCCC	1.25276	-2.63906	-0.869771	3	50	48	69.1044	64.4993	70.4993	0.0322965	17	4	29	1	0.660616	AOX1;AOX1	intron_variant;intron_variant	protein_coding;protein_coding	ANN=C|intron_variant|MODIFIER|AOX1|AOX1|transcript|NM_001159.3|protein_coding|32/34|c.3609+691T>C||||||,TCCCCCC|intron_variant|MODIFIER|AOX1|AOX1|transcript|NM_001159.3|protein_coding|32/34|c.3609+693_3609+698dupCCCCCC||||||INFO_REALIGN_3_PRIME
chr6_32811383_A_G	1.25276	-2.63906	-0.869771	3	50	48	69.1044	64.4993	70.4993	0.0322965	17	4	29	1	0.660616	TAP2;PSMB8-AS1;TAP2;TAP2;PSMB8-AS1;PSMB8-AS1;PSMB8-AS1;TAP1;TAP1;PSMB8;PSMB8	upstream_gene_variant;upstream_gene_variant;upstream_gene_variant;upstream_gene_variant;upstream_gene_variant;upstream_gene_variant;upstream_gene_variant;downstream_gene_variant;downstream_gene_variant;intron_variant;intron_variant	protein_coding;pseudogene;protein_coding;protein_coding;pseudogene;pseudogene;pseudogene;protein_coding;protein_coding;protein_coding;protein_coding	ANN=G|upstream_gene_variant|MODIFIER|TAP2|TAP2.2|transcript|NM_000544.3.8|protein_coding||c.-5373T>C|||||4836|,G|upstream_gene_variant|MODIFIER|PSMB8-AS1|PSMB8-AS1.6|transcript|NR_037173.1.6|pseudogene||n.-480A>G|||||480|,G|upstream_gene_variant|MODIFIER|TAP2|TAP2.2|transcript|NM_018833.2.2|protein_coding||c.-5373T>C|||||4836|,G|upstream_gene_variant|MODIFIER|TAP2|TAP2.2|transcript|NM_001290043.1…
chr1_47410549_G_A	0.805816	-1.79053	-0.23468	3	50	48	69.1044	64.5017	70.5017	0.0323424	15	6	28	2	0.660616	CYP4A11;CYP4A11-CYP4X1	upstream_gene_variant;intergenic_region	protein_coding;	ANN=A|upstream_gene_variant|MODIFIER|CYP4A11|CYP4A11|transcript|NM_000778.3|protein_coding||c.-3444C>T|||||3393|,A|intergenic_region|MODIFIER|CYP4A11-CYP4X1|CYP4A11-CYP4X1|intergenic_region|CYP4A11-CYP4X1|||n.47410549G>A||||||
chr6_52843429_A_G	0.805816	-1.79053	-0.23468	3	50	48	69.1044	64.5017	70.5017	0.0323424	15	6	28	2	0.660616	GSTA4	intron_variant	protein_coding	ANN=G|intron_variant|MODIFIER|GSTA4|GSTA4|transcript|NM_001512.3|protein_coding|6/6|c.547-39T>C||||||
chr1_110211806_C_G	0.287682	17.3837	-0.105361	3	50	48	69.1044	64.596	70.596	0.0341747	21	0	26	4	0.660616	GSTM4;GSTM2;GSTM2	downstream_gene_variant;intron_variant;intron_variant	protein_coding;protein_coding;protein_coding	ANN=G|downstream_gene_variant|MODIFIER|GSTM4|GSTM4|transcript|NM_147148.2|protein_coding||c.*4153C>G|||||3683|,G|intron_variant|MODIFIER|GSTM2|GSTM2|transcript|NM_000848.3|protein_coding|3/7|c.178-106C>G||||||,G|intron_variant|MODIFIER|GSTM2|GSTM2|transcript|NM_001142368.1|protein_coding|3/8|c.178-106C>G||||||
chr16_16262075_G_GTGGTGGCTCATGCCTGTGATCCCAACACTTTGGGAGTTTGAGGCGGAGGATTGCCTGAGCCCAGGAGTTTGAGACCAGGCCGGGCC	0.287682	17.3837	-0.105361	3	50	48	69.1044	64.596	70.596	0.0341747	21	0	26	4	0.660616	ABCC6	intron_variant	protein_coding	ANN=GTGGTGGCTCATGCCTGTGATCCCAACACTTTGGGAGTTTGAGGCGGAGGATTGCCTGAGCCCAGGAGTTTGAGACCAGGCCGGGCC|intron_variant|MODIFIER|ABCC6|ABCC6|transcript|NM_001171.5|protein_coding|22/30|c.2995+1427_2995+1428insGGCCCGGCCTGGTCTCAAACTCCTGGGCTCAGGCAATCCTCCGCCTCAAACTCCCAAAGTGTTGGGATCACAGGCATGAGCCACCA||||||
chr21_43713719_CCACACTA_C	0.287682	17.3837	-0.105361	3	50	48	69.1044	64.596	70.596	0.0341747	21	0	26	4	0.660616	ABCG1;ABCG1;ABCG1;ABCG1;ABCG1;ABCG1	intron_variant;intron_variant;intron_variant;intron_variant;intron_variant;intron_variant	protein_coding;protein_coding;protein_coding;protein_coding;protein_coding;protein_coding	ANN=C|intron_variant|MODIFIER|ABCG1|ABCG1|transcript|NM_004915.3|protein_coding|13/14|c.1690-920_1690-914delTACACAC||||||INFO_REALIGN_3_PRIME,C|intron_variant|MODIFIER|ABCG1|ABCG1|transcript|NM_207627.1|protein_coding|14/15|c.1660-920_1660-914delTACACAC||||||INFO_REALIGN_3_PRIME,C|intron_variant|MODIFIER|ABCG1|ABCG1|transcript|NM_207628.1|protein_coding|15/16|c.1588-920_1588-914delTACACAC||||||IN…
chr3_38307510_T_C	0.287682	17.3837	-0.105361	3	50	48	69.1044	64.596	70.596	0.0341747	21	0	26	4	0.660616	SLC22A13	synonymous_variant	protein_coding	ANN=C|synonymous_variant|LOW|SLC22A13|SLC22A13|transcript|NM_004256.3|protein_coding|1/10|c.159T>C|p.Ala53Ala|213/2560|159/1656|53/551||
chr3_38315626_T_C	0.287682	17.3837	-0.105361	3	50	48	69.1044	64.596	70.596	0.0341747	21	0	26	4	0.660616	SLC22A13	intron_variant	protein_coding	ANN=C|intron_variant|MODIFIER|SLC22A13|SLC22A13|transcript|NM_004256.3|protein_coding|1/9|c.379-137T>C||||||
chr3_38317721_C_T	0.287682	17.3837	-0.105361	3	50	48	69.1044	64.596	70.596	0.0341747	21	0	26	4	0.660616	SLC22A13	intron_variant	protein_coding	ANN=T|intron_variant|MODIFIER|SLC22A13|SLC22A13|transcript|NM_004256.3|protein_coding|7/9|c.1238-57C>T||||||
chr1_20931601_T_TATTC	0.287682	17.3837	-0.105361	3	50	48	69.1044	64.596	70.596	0.0341747	21	0	26	4	0.660616	CDA	intron_variant	protein_coding	ANN=TATTC|intron_variant|MODIFIER|CDA|CDA|transcript|NM_001785.2|protein_coding|2/3|c.266+84_266+87dupTCAT||||||INFO_REALIGN_3_PRIME
chr1_97856828_C_T	0.154151	17.3504	0.0822381	3	50	48	69.1044	64.6072	70.6072	0.0343978	21	0	26	4	0.660616	DPYD	intron_variant	protein_coding	ANN=T|intron_variant|MODIFIER|DPYD|DPYD|transcript|NM_000110.3|protein_coding|14/22|c.1906-8811G>A||||||
chr1_165619079_C_T	0.154151	17.3504	0.0822381	3	50	48	69.1044	64.6072	70.6072	0.0343978	21	0	26	4	0.660616	MGST3;MGST3;MGST3	splice_region_variant;5_prime_UTR_premature_start_codon_gain_variant;5_prime_UTR_variant	protein_coding;protein_coding;protein_coding	ANN=T|splice_region_variant|LOW|MGST3|MGST3|transcript|NM_004528.3|protein_coding|2/6|c.-6C>T||||||,T|5_prime_UTR_premature_start_codon_gain_variant|LOW|MGST3|MGST3|transcript|NM_004528.3|protein_coding|2/6|c.-6C>T||||||,T|5_prime_UTR_variant|MODIFIER|MGST3|MGST3|transcript|NM_004528.3|protein_coding|2/6|c.-6C>T|||||6|
chr1_209879846_T_G	0.154151	17.3504	0.0822381	3	50	48	69.1044	64.6072	70.6072	0.0343978	21	0	26	4	0.660616	HSD11B1;HSD11B1;HSD11B1	intron_variant;intron_variant;intron_variant	protein_coding;protein_coding;protein_coding	ANN=G|intron_variant|MODIFIER|HSD11B1|HSD11B1|transcript|NM_001206741.1|protein_coding|3/6|c.220-208T>G||||||,G|intron_variant|MODIFIER|HSD11B1|HSD11B1|transcript|NM_181755.2|protein_coding|3/6|c.220-208T>G||||||,G|intron_variant|MODIFIER|HSD11B1|HSD11B1|transcript|NM_005525.3|protein_coding|2/5|c.220-208T>G||||||
chr11_63177203_G_A	0.154151	17.3504	0.0822381	3	50	48	69.1044	64.6072	70.6072	0.0343978	21	0	26	4	0.660616	SLC22A9	intron_variant	protein_coding	ANN=A|intron_variant|MODIFIER|SLC22A9|SLC22A9|transcript|NM_080866.2|protein_coding|9/9|c.1602-71G>A||||||
chr11_67429513_C_G	0.154151	17.3504	0.0822381	3	50	48	69.1044	64.6072	70.6072	0.0343978	21	0	26	4	0.660616	ALDH3B2;ALDH3B2;ACY3-ALDH3B2	downstream_gene_variant;downstream_gene_variant;intergenic_region	protein_coding;protein_coding;	ANN=G|downstream_gene_variant|MODIFIER|ALDH3B2|ALDH3B2|transcript|NM_000695.3|protein_coding||c.*1173G>C|||||120|,G|downstream_gene_variant|MODIFIER|ALDH3B2|ALDH3B2|transcript|NM_001031615.1|protein_coding||c.*1173G>C|||||120|,G|intergenic_region|MODIFIER|ACY3-ALDH3B2|ACY3-ALDH3B2|intergenic_region|ACY3-ALDH3B2|||n.67429513C>G||||||
chr12_20592624_G_A	0.154151	17.3504	0.0822381	3	50	48	69.1044	64.6072	70.6072	0.0343978	21	0	26	4	0.660616	PDE3A	intron_variant	protein_coding	ANN=A|intron_variant|MODIFIER|PDE3A|PDE3A|transcript|NM_000921.4|protein_coding|1/15|c.960+69446G>A||||||
chr13_52513266_T_C	0.154151	17.3504	0.0822381	3	50	48	69.1044	64.6072	70.6072	0.0343978	21	0	26	4	0.660616	ATP7B;ATP7B;ATP7B	missense_variant;missense_variant;missense_variant	protein_coding;protein_coding;protein_coding	ANN=C|missense_variant|MODERATE|ATP7B|ATP7B|transcript|NM_000053.3|protein_coding|17/21|c.3620A>G|p.His1207Arg|3777/6641|3620/4398|1207/1465||,C|missense_variant|MODERATE|ATP7B|ATP7B|transcript|NM_001005918.2|protein_coding|13/17|c.2999A>G|p.His1000Arg|3156/6020|2999/3777|1000/1258||,C|missense_variant|MODERATE|ATP7B|ATP7B|transcript|NM_001243182.1|protein_coding|18/22|c.3287A>G|p.His1096Arg|3444…
chr13_52544577_C_T	0.154151	17.3504	0.0822381	3	50	48	69.1044	64.6072	70.6072	0.0343978	21	0	26	4	0.660616	ATP7B;ATP7B;ATP7B	intron_variant;intron_variant;intron_variant	protein_coding;protein_coding;protein_coding	ANN=T|intron_variant|MODIFIER|ATP7B|ATP7B|transcript|NM_000053.3|protein_coding|3/20|c.1543+51G>A||||||,T|intron_variant|MODIFIER|ATP7B|ATP7B|transcript|NM_001005918.2|protein_coding|3/16|c.1543+51G>A||||||,T|intron_variant|MODIFIER|ATP7B|ATP7B|transcript|NM_001243182.1|protein_coding|4/21|c.1210+51G>A||||||
chr15_58315856_G_GAAAAAAAAAA,GAAAAAAAA	0.154151	17.3504	0.0822381	3	50	48	69.1044	64.6072	70.6072	0.0343978	21	0	26	4	0.660616	ALDH1A2;ALDH1A2;ALDH1A2;ALDH1A2;ALDH1A2;ALDH1A2	intron_variant;intron_variant;intron_variant;intron_variant;intron_variant;intron_variant	protein_coding;protein_coding;protein_coding;protein_coding;protein_coding;protein_coding	ANN=GAAAAAAAAAA|intron_variant|MODIFIER|ALDH1A2|ALDH1A2|transcript|NM_003888.3|protein_coding|1/12|c.118-9387_118-9378dupTTTTTTTTTT||||||,GAAAAAAAA|intron_variant|MODIFIER|ALDH1A2|ALDH1A2|transcript|NM_003888.3|protein_coding|1/12|c.118-9385_118-9378dupTTTTTTTT||||||,GAAAAAAAAAA|intron_variant|MODIFIER|ALDH1A2|ALDH1A2|transcript|NM_001206897.1|protein_coding|2/13|c.55-9387_55-9378dupTTTTTTTTTT|||…
chr19_41352840_G_A	0.154151	17.3504	0.0822381	3	50	48	69.1044	64.6072	70.6072	0.0343978	21	0	26	4	0.660616	CYP2A6	synonymous_variant	protein_coding	ANN=A|synonymous_variant|LOW|CYP2A6|CYP2A6|transcript|NM_000762.5|protein_coding|5/9|c.771C>T|p.Arg257Arg|792/1764|771/1485|257/494||
chr19_41356188_C_T	0.154151	17.3504	0.0822381	3	50	48	69.1044	64.6072	70.6072	0.0343978	21	0	26	4	0.660616	CYP2A6	synonymous_variant	protein_coding	ANN=T|synonymous_variant|LOW|CYP2A6|CYP2A6|transcript|NM_000762.5|protein_coding|1/9|c.144G>A|p.Gln48Gln|165/1764|144/1485|48/494||
chr19_48386800_C_T	0.154151	17.3504	0.0822381	3	50	48	69.1044	64.6072	70.6072	0.0343978	21	0	26	4	0.660616	SULT2A1	intron_variant	protein_coding	ANN=T|intron_variant|MODIFIER|SULT2A1|SULT2A1|transcript|NM_003167.3|protein_coding|2/5|c.345+34G>A||||||
chr21_37502697_G_T	0.154151	17.3504	0.0822381	3	50	48	69.1044	64.6072	70.6072	0.0343978	21	0	26	4	0.660616	LOC100133286;CBR3;CBR3-AS1;CBR3-AS1;LOC100133286-CBR3-AS1	upstream_gene_variant;upstream_gene_variant;downstream_gene_variant;downstream_gene_variant;intergenic_region	pseudogene;protein_coding;pseudogene;pseudogene;	ANN=T|upstream_gene_variant|MODIFIER|LOC100133286|LOC100133286|transcript|NR_040084.1|pseudogene||n.-3759C>A|||||3759|,T|upstream_gene_variant|MODIFIER|CBR3|CBR3|transcript|NM_001236.3|protein_coding||c.-4794G>T|||||4566|,T|downstream_gene_variant|MODIFIER|CBR3-AS1|CBR3-AS1|transcript|NR_038892.1|pseudogene||n.*1368C>A|||||1368|,T|downstream_gene_variant|MODIFIER|CBR3-AS1|CBR3-AS1|transcript|NR_0…
chr21_37518582_G_A	0.154151	17.3504	0.0822381	3	50	48	69.1044	64.6072	70.6072	0.0343978	21	0	26	4	0.660616	CBR3;CBR3-AS1;CBR3-AS1;CBR3-AS1	synonymous_variant;non_coding_exon_variant;non_coding_exon_variant;non_coding_exon_variant	protein_coding;pseudogene;pseudogene;pseudogene	ANN=A|synonymous_variant|LOW|CBR3|CBR3|transcript|NM_001236.3|protein_coding|3/3|c.606G>A|p.Thr202Thr|834/1112|606/834|202/277||,A|non_coding_exon_variant|MODIFIER|CBR3-AS1|CBR3-AS1|transcript|NR_038892.1|pseudogene|2/4|n.164C>T||||||,A|non_coding_exon_variant|MODIFIER|CBR3-AS1|CBR3-AS1|transcript|NR_038893.1|pseudogene|2/3|n.164C>T||||||,A|non_coding_exon_variant|MODIFIER|CBR3-AS1|CBR3-AS1|trans…
chr21_37520896_G_A	0.154151	17.3504	0.0822381	3	50	48	69.1044	64.6072	70.6072	0.0343978	21	0	26	4	0.660616	CBR3;CBR3-AS1;CBR3-AS1;CBR3-AS1	downstream_gene_variant;intron_variant;intron_variant;intron_variant	protein_coding;pseudogene;pseudogene;pseudogene	ANN=A|downstream_gene_variant|MODIFIER|CBR3|CBR3|transcript|NM_001236.3|protein_coding||c.*2086G>A|||||2036|,A|intron_variant|MODIFIER|CBR3-AS1|CBR3-AS1|transcript|NR_038892.1|pseudogene|1/3|n.93-2243C>T||||||,A|intron_variant|MODIFIER|CBR3-AS1|CBR3-AS1|transcript|NR_038893.1|pseudogene|1/2|n.93-2243C>T||||||,A|intron_variant|MODIFIER|CBR3-AS1|CBR3-AS1|transcript|NR_038894.1|pseudogene|1/2|n.93-2…
chr7_2472429_C_A	0.154151	17.3504	0.0822381	3	50	48	69.1044	64.6072	70.6072	0.0343978	21	0	26	4	0.660616	CHST12;CHST12;CHST12;LOC101927181	missense_variant;missense_variant;missense_variant;upstream_gene_variant	protein_coding;protein_coding;protein_coding;pseudogene	ANN=A|missense_variant|MODERATE|CHST12|CHST12|transcript|NM_001243794.1|protein_coding|2/2|c.155C>A|p.Pro52His|318/2105|155/1245|52/414||,A|missense_variant|MODERATE|CHST12|CHST12|transcript|NM_001243795.1|protein_coding|2/2|c.155C>A|p.Pro52His|332/2119|155/1245|52/414||,A|missense_variant|MODERATE|CHST12|CHST12|transcript|NM_018641.4|protein_coding|2/2|c.155C>A|p.Pro52His|346/2133|155/1245|52/41…
chr7_2472455_A_T	0.154151	17.3504	0.0822381	3	50	48	69.1044	64.6072	70.6072	0.0343978	21	0	26	4	0.660616	CHST12;CHST12;CHST12;LOC101927181	missense_variant;missense_variant;missense_variant;upstream_gene_variant	protein_coding;protein_coding;protein_coding;pseudogene	ANN=T|missense_variant|MODERATE|CHST12|CHST12|transcript|NM_001243794.1|protein_coding|2/2|c.181A>T|p.Thr61Ser|344/2105|181/1245|61/414||,T|missense_variant|MODERATE|CHST12|CHST12|transcript|NM_001243795.1|protein_coding|2/2|c.181A>T|p.Thr61Ser|358/2119|181/1245|61/414||,T|missense_variant|MODERATE|CHST12|CHST12|transcript|NM_018641.4|protein_coding|2/2|c.181A>T|p.Thr61Ser|372/2133|181/1245|61/41…
chr8_65527669_C_T	0.154151	17.3504	0.0822381	3	50	48	69.1044	64.6072	70.6072	0.0343978	21	0	26	4	0.660616	CYP7B1	missense_variant	protein_coding	ANN=T|missense_variant|MODERATE|CYP7B1|CYP7B1|transcript|NM_004820.3|protein_coding|4/6|c.971G>A|p.Arg324His|1175/2395|971/1521|324/506||
chr8_143959272_T_C	0.154151	17.3504	0.0822381	3	50	48	69.1044	64.6072	70.6072	0.0343978	21	0	26	4	0.660616	CYP11B1;CYP11B1	intron_variant;intron_variant	protein_coding;protein_coding	ANN=C|intron_variant|MODIFIER|CYP11B1|CYP11B1|transcript|NM_000497.3|protein_coding|2/8|c.396-634A>G||||||,C|intron_variant|MODIFIER|CYP11B1|CYP11B1|transcript|NM_001026213.1|protein_coding|2/7|c.396-634A>G||||||
chr1_97944341_G_A	0.653615	-1.72761	-0.0395266	3	50	48	69.1044	64.6122	70.6122	0.0344988	15	6	28	2	0.660616	DPYD	intron_variant	protein_coding	ANN=A|intron_variant|MODIFIER|DPYD|DPYD|transcript|NM_000110.3|protein_coding|13/22|c.1741-28562C>T||||||
chr19_34267676_G_GC	0.653615	-1.72761	-0.0395266	3	50	48	69.1044	64.6122	70.6122	0.0344988	15	6	28	2	0.660616	CHST8;CHST8;CHST8;CHST8-KCTD15	downstream_gene_variant;downstream_gene_variant;downstream_gene_variant;intergenic_region	protein_coding;protein_coding;protein_coding;	ANN=GC|downstream_gene_variant|MODIFIER|CHST8|CHST8|transcript|NM_001127895.1|protein_coding||c.*3708_*3709insC|||||3263|,GC|downstream_gene_variant|MODIFIER|CHST8|CHST8|transcript|NM_001127896.1|protein_coding||c.*3708_*3709insC|||||3263|,GC|downstream_gene_variant|MODIFIER|CHST8|CHST8|transcript|NM_022467.3|protein_coding||c.*3708_*3709insC|||||3263|,GC|intergenic_region|MODIFIER|CHST8-KCTD15|C…
chr21_43634547_A_G	0.653615	-1.72761	-0.0395266	3	50	48	69.1044	64.6122	70.6122	0.0344988	15	6	28	2	0.660616	ABCG1;ABCG1;ABCG1;ABCG1;ABCG1	upstream_gene_variant;upstream_gene_variant;upstream_gene_variant;intron_variant;intron_variant	protein_coding;protein_coding;protein_coding;protein_coding;protein_coding	ANN=G|upstream_gene_variant|MODIFIER|ABCG1|ABCG1|transcript|NM_004915.3|protein_coding||c.-4826A>G|||||4720|,G|upstream_gene_variant|MODIFIER|ABCG1|ABCG1|transcript|NM_207629.1|protein_coding||c.-1719A>G|||||1640|,G|upstream_gene_variant|MODIFIER|ABCG1|ABCG1|transcript|NM_016818.2|protein_coding||c.-4826A>G|||||4720|,G|intron_variant|MODIFIER|ABCG1|ABCG1|transcript|NM_207627.1|protein_coding|2/15…
chr15_51634304_G_T	-0.247637	1.33982	0.246478	3	50	48	69.1044	64.6523	70.6523	0.0353187	17	4	16	14	0.667791	CYP19A1;CYP19A1;GLDN	upstream_gene_variant;upstream_gene_variant;intron_variant	protein_coding;protein_coding;protein_coding	ANN=T|upstream_gene_variant|MODIFIER|CYP19A1|CYP19A1|transcript|NM_000103.3|protein_coding||c.-99195C>A|||||3509|,T|upstream_gene_variant|MODIFIER|CYP19A1|CYP19A1|transcript|NM_031226.2|protein_coding||c.-99195C>A|||||3509|,T|intron_variant|MODIFIER|GLDN|GLDN|transcript|NM_181789.2|protein_coding|1/9|c.363+60G>T||||||
chr15_51634312_G_T	-0.247637	1.33982	0.246478	3	50	48	69.1044	64.6523	70.6523	0.0353187	17	4	16	14	0.667791	CYP19A1;CYP19A1;GLDN	upstream_gene_variant;upstream_gene_variant;intron_variant	protein_coding;protein_coding;protein_coding	ANN=T|upstream_gene_variant|MODIFIER|CYP19A1|CYP19A1|transcript|NM_000103.3|protein_coding||c.-99203C>A|||||3517|,T|upstream_gene_variant|MODIFIER|CYP19A1|CYP19A1|transcript|NM_031226.2|protein_coding||c.-99203C>A|||||3517|,T|intron_variant|MODIFIER|GLDN|GLDN|transcript|NM_181789.2|protein_coding|1/9|c.363+68G>T||||||
chr15_51634322_TCTTCTCCCCTGGCCAGG_T	-0.247637	1.33982	0.246478	3	50	48	69.1044	64.6523	70.6523	0.0353187	17	4	16	14	0.667791	CYP19A1;CYP19A1;GLDN	upstream_gene_variant;upstream_gene_variant;intron_variant	protein_coding;protein_coding;protein_coding	ANN=T|upstream_gene_variant|MODIFIER|CYP19A1|CYP19A1|transcript|NM_000103.3|protein_coding||c.-99230_-99214delCCTGGCCAGGGGAGAAG|||||3528|,T|upstream_gene_variant|MODIFIER|CYP19A1|CYP19A1|transcript|NM_031226.2|protein_coding||c.-99230_-99214delCCTGGCCAGGGGAGAAG|||||3528|,T|intron_variant|MODIFIER|GLDN|GLDN|transcript|NM_181789.2|protein_coding|1/9|c.363+81_363+97delTCTCCCCTGGCCAGGCT||||||INFO_REA…
chr7_95053376_G_T	0.957741	-1.49093	-0.328954	3	50	48	69.1044	64.7072	70.7072	0.0364744	13	8	26	4	0.685353	PON2;PON2	intron_variant;intron_variant	protein_coding;protein_coding	ANN=T|intron_variant|MODIFIER|PON2|PON2|transcript|NM_000305.2|protein_coding|2/8|c.145+451C>A||||||,T|intron_variant|MODIFIER|PON2|PON2|transcript|NM_001018161.1|protein_coding|2/8|c.145+451C>A||||||
chr9_107650430_A_G	-0.340769	2.09019	0.608162	3	50	48	69.1044	64.7108	70.7108	0.0365522	20	1	23	7	0.685353	ABCA1	intron_variant	protein_coding	ANN=G|intron_variant|MODIFIER|ABCA1|ABCA1|transcript|NM_005502.3|protein_coding|3/49|c.160+953T>C||||||
chr2_169828325_A_G	-1.02678	1.52787	0.222328	3	50	48	69.1044	64.7495	70.7495	0.0373911	7	14	3	27	0.692428	ABCB11	intron_variant	protein_coding	ANN=G|intron_variant|MODIFIER|ABCB11|ABCB11|transcript|NM_003742.2|protein_coding|14/27|c.1638+32T>C||||||
chr2_169830155_G_A	-1.02678	1.52787	0.222328	3	50	48	69.1044	64.7495	70.7495	0.0373911	7	14	3	27	0.692428	ABCB11	intron_variant	protein_coding	ANN=A|intron_variant|MODIFIER|ABCB11|ABCB11|transcript|NM_003742.2|protein_coding|13/27|c.1434+70C>T||||||
chr2_169830328_A_G	-1.02678	1.52787	0.222328	3	50	48	69.1044	64.7495	70.7495	0.0373911	7	14	3	27	0.692428	ABCB11	missense_variant	protein_coding	ANN=G|missense_variant|MODERATE|ABCB11|ABCB11|transcript|NM_003742.2|protein_coding|13/28|c.1331T>C|p.Val444Ala|1457/4775|1331/3966|444/1321||
chr1_9126002_CA_C	0.731102	-1.52011	-0.0979197	3	50	48	69.1044	64.8404	70.8404	0.039446	14	7	27	3	0.726309	SLC2A5;SLC2A5	intron_variant;intron_variant	protein_coding;protein_coding	ANN=C|intron_variant|MODIFIER|SLC2A5|SLC2A5|transcript|NM_003039.2|protein_coding|1/11|c.33+3560delT||||||,C|intron_variant|MODIFIER|SLC2A5|SLC2A5|transcript|NM_001135585.1|protein_coding|1/4|c.33+3560delT||||||
chr2_234676413_T_C	0.00707175	1.5564	0.0616056	3	50	48	69.1044	64.8446	70.8446	0.0395435	19	2	20	10	0.726309	UGT1A8;UGT1A10;UGT1A9;UGT1A7;UGT1A6;UGT1A5;UGT1A4;UGT1A3;UGT1A1;UGT1A6	intron_variant;intron_variant;intron_variant;intron_variant;intron_variant;intron_variant;intron_variant;intron_variant;intron_variant;intron_variant	protein_coding;protein_coding;protein_coding;protein_coding;protein_coding;protein_coding;protein_coding;protein_coding;protein_coding;protein_coding	ANN=C|intron_variant|MODIFIER|UGT1A8|UGT1A8|transcript|NM_019076.4|protein_coding|2/4|c.988-82T>C||||||,C|intron_variant|MODIFIER|UGT1A10|UGT1A10|transcript|NM_019075.2|protein_coding|2/4|c.988-82T>C||||||,C|intron_variant|MODIFIER|UGT1A9|UGT1A9|transcript|NM_021027.2|protein_coding|2/4|c.988-82T>C||||||,C|intron_variant|MODIFIER|UGT1A7|UGT1A7|transcript|NM_019077.2|protein_coding|2/4|c.988-82T>C…
chr7_99459256_C_T	0.610249	-1.50235	0.0637634	3	50	48	69.1044	64.8522	70.8522	0.039721	14	7	27	3	0.726604	CYP3A43;CYP3A43;CYP3A43;CYP3A43;CYP3A43;CYP3A43	synonymous_variant;synonymous_variant;synonymous_variant;synonymous_variant;non_coding_exon_variant;non_coding_exon_variant	protein_coding;protein_coding;protein_coding;protein_coding;pseudogene;pseudogene	ANN=T|synonymous_variant|LOW|CYP3A43|CYP3A43|transcript|NM_022820.4|protein_coding|11/13|c.1047C>T|p.Ala349Ala|1150/1721|1047/1515|349/504||,T|synonymous_variant|LOW|CYP3A43|CYP3A43|transcript|NM_001278921.1|protein_coding|8/10|c.717C>T|p.Ala239Ala|820/1388|717/1182|239/393||,T|synonymous_variant|LOW|CYP3A43|CYP3A43|transcript|NM_057095.2|protein_coding|11/13|c.1047C>T|p.Ala349Ala|1150/1718|1047/…
chr1_47279789_C_T	0.779412	-1.32881	-0.0598953	3	50	48	69.1044	64.8676	70.8676	0.0400825	12	9	25	5	0.730247	CYP4B1;CYP4B1	intron_variant;intron_variant	protein_coding;protein_coding	ANN=T|intron_variant|MODIFIER|CYP4B1|CYP4B1|transcript|NM_001099772.1|protein_coding|6/11|c.775+54C>T||||||,T|intron_variant|MODIFIER|CYP4B1|CYP4B1|transcript|NM_000779.3|protein_coding|6/11|c.772+54C>T||||||
chr3_183699516_T_C	-0.193612	1.19333	-0.105663	3	50	48	69.1044	64.9705	70.9705	0.0425943	13	8	10	20	0.77288	ABCC5;ABCC5	splice_region_variant&synonymous_variant;downstream_gene_variant	protein_coding;protein_coding	ANN=C|splice_region_variant&synonymous_variant|LOW|ABCC5|ABCC5|transcript|NM_005688.2|protein_coding|8/30|c.1146A>G|p.Gln382Gln|1311/5843|1146/4314|382/1437||,C|downstream_gene_variant|MODIFIER|ABCC5|ABCC5|transcript|NM_001023587.1|protein_coding||c.*3615A>G|||||2025|
chr15_85447431_G_A	-0.284438	1.19684	0.188066	3	50	48	69.1044	64.9958	70.9958	0.0432356	15	6	13	17	0.781367	SLC28A1;SLC28A1;SLC28A1	missense_variant;missense_variant;missense_variant	protein_coding;protein_coding;protein_coding	ANN=A|missense_variant|MODERATE|SLC28A1|SLC28A1|transcript|NM_001287762.1|protein_coding|6/18|c.565G>A|p.Val189Ile|672/2653|565/1950|189/649||,A|missense_variant|MODERATE|SLC28A1|SLC28A1|transcript|NM_001287761.1|protein_coding|6/15|c.565G>A|p.Val189Ile|672/2155|565/1452|189/483||,A|missense_variant|MODERATE|SLC28A1|SLC28A1|transcript|NM_004213.4|protein_coding|7/19|c.565G>A|p.Val189Ile|788/2769|…
chr4_70079838_T_C	0.504378	-1.55516	1.11965	3	50	48	69.1044	65.0188	71.0188	0.0438273	6	15	15	15	0.787716	UGT2B11	synonymous_variant	protein_coding	ANN=C|synonymous_variant|LOW|UGT2B11|UGT2B11|transcript|NM_001073.1|protein_coding|1/6|c.603A>G|p.Leu201Leu|612/1706|603/1590|201/529||
chr1_47265989_T_C	-0.548275	2.24404	0.892739	3	50	48	69.1044	65.0478	71.0478	0.0445879	20	1	24	6	0.787716	CYP4B1;CYP4B1	intron_variant;intron_variant	protein_coding;protein_coding	ANN=C|intron_variant|MODIFIER|CYP4B1|CYP4B1|transcript|NM_001099772.1|protein_coding|1/11|c.180+1056T>C||||||,C|intron_variant|MODIFIER|CYP4B1|CYP4B1|transcript|NM_000779.3|protein_coding|1/11|c.180+1056T>C||||||
chr6_110778128_T_C	-0.105504	1.19047	-0.0554397	3	50	48	69.1044	65.0687	71.0687	0.0451423	15	6	13	17	0.787716	SLC22A16	missense_variant	protein_coding	ANN=C|missense_variant|MODERATE|SLC22A16|SLC22A16|transcript|NM_033125.3|protein_coding|2/8|c.146A>G|p.His49Arg|213/1985|146/1734|49/577||
chr14_23258189_T_G	-0.165793	1.92719	0.398785	3	50	48	69.1044	65.0913	71.0913	0.0457536	20	1	23	7	0.787716	SLC7A7;SLC7A7;SLC7A7	intron_variant;intron_variant;intron_variant	protein_coding;pseudogene;protein_coding	ANN=G|intron_variant|MODIFIER|SLC7A7|SLC7A7|transcript|NM_001126105.2|protein_coding|3/10|c.500-8929A>C||||||,G|intron_variant|MODIFIER|SLC7A7|SLC7A7|transcript|NR_040448.1|pseudogene|2/9|n.1115-8929A>C||||||,G|intron_variant|MODIFIER|SLC7A7|SLC7A7|transcript|NM_001126106.2|protein_coding|3/10|c.500-8929A>C||||||
chr1_171223134_G_A	-0.165793	1.92719	0.398785	3	50	48	69.1044	65.0913	71.0913	0.0457536	20	1	23	7	0.787716	FMO1;FMO1;FMO1;FMO1	upstream_gene_variant;intron_variant;intron_variant;intron_variant	protein_coding;protein_coding;protein_coding;protein_coding	ANN=A|upstream_gene_variant|MODIFIER|FMO1|FMO1|transcript|NM_001282692.1|protein_coding||c.-4081G>A|||||3928|,A|intron_variant|MODIFIER|FMO1|FMO1|transcript|NM_001282693.1|protein_coding|1/8|c.-6-4087G>A||||||,A|intron_variant|MODIFIER|FMO1|FMO1|transcript|NM_001282694.1|protein_coding|1/7|c.-6-4087G>A||||||,A|intron_variant|MODIFIER|FMO1|FMO1|transcript|NM_002021.2|protein_coding|1/8|c.-6-4087G>…
chr7_20666235_G_C	-0.165793	1.92719	0.398785	3	50	48	69.1044	65.0913	71.0913	0.0457536	20	1	23	7	0.787716	ABCB5	splice_donor_variant&intron_variant	protein_coding	ANN=C|splice_donor_variant&intron_variant|HIGH|ABCB5|ABCB5|transcript|NM_001163941.1|protein_coding|3/27|c.108+1G>C||||||
chr1_146663125_A_G	17.5661	-17.7484	-17.1831	3	50	48	69.1044	65.1188	71.1188	0.0465046	15	6	25	5	0.787716	FMO5;FMO5;FMO5	intron_variant;intron_variant;intron_variant	protein_coding;protein_coding;protein_coding	ANN=G|intron_variant|MODIFIER|FMO5|FMO5|transcript|NM_001461.3|protein_coding|7/8|c.1184-1297T>C||||||,G|intron_variant|MODIFIER|FMO5|FMO5|transcript|NM_001144829.2|protein_coding|7/8|c.1184-1297T>C||||||,G|intron_variant|MODIFIER|FMO5|FMO5|transcript|NM_001144830.2|protein_coding|5/6|c.831-1297T>C||||||
chr1_146663130_C_T	17.5661	-17.7484	-17.1831	3	50	48	69.1044	65.1188	71.1188	0.0465046	15	6	25	5	0.787716	FMO5;FMO5;FMO5	intron_variant;intron_variant;intron_variant	protein_coding;protein_coding;protein_coding	ANN=T|intron_variant|MODIFIER|FMO5|FMO5|transcript|NM_001461.3|protein_coding|7/8|c.1184-1302G>A||||||,T|intron_variant|MODIFIER|FMO5|FMO5|transcript|NM_001144829.2|protein_coding|7/8|c.1184-1302G>A||||||,T|intron_variant|MODIFIER|FMO5|FMO5|transcript|NM_001144830.2|protein_coding|5/6|c.831-1302G>A||||||
chr12_20877385_A_G	17.5661	-17.7484	-17.1831	3	50	48	69.1044	65.1188	71.1188	0.0465046	15	6	25	5	0.787716	SLCO1C1;SLCO1C1;SLCO1C1;SLCO1C1	intron_variant;intron_variant;intron_variant;intron_variant	protein_coding;protein_coding;protein_coding;protein_coding	ANN=G|intron_variant|MODIFIER|SLCO1C1|SLCO1C1|transcript|NM_001145946.1|protein_coding|10/15|c.1186+1197A>G||||||,G|intron_variant|MODIFIER|SLCO1C1|SLCO1C1|transcript|NM_001145945.1|protein_coding|9/14|c.1039+1197A>G||||||,G|intron_variant|MODIFIER|SLCO1C1|SLCO1C1|transcript|NM_001145944.1|protein_coding|7/12|c.832+1197A>G||||||,G|intron_variant|MODIFIER|SLCO1C1|SLCO1C1|transcript|NM_017435.4|pro…
chr4_69511936_T_C	17.5661	-17.7484	-17.1831	3	50	48	69.1044	65.1188	71.1188	0.0465046	15	6	25	5	0.787716	UGT2B15;UGT2B17-UGT2B15	downstream_gene_variant;intergenic_region	protein_coding;	ANN=C|downstream_gene_variant|MODIFIER|UGT2B15|UGT2B15|transcript|NM_001076.3|protein_coding||c.*886A>G|||||379|,C|intergenic_region|MODIFIER|UGT2B17-UGT2B15|UGT2B17-UGT2B15|intergenic_region|UGT2B17-UGT2B15|||n.69511936T>C||||||
chr1_97660692_A_G	1.21366	-2.03536	-0.781224	3	50	48	69.1044	65.1607	71.1607	0.0476786	16	5	28	2	0.787716	DPYD;DPYD-AS1	intron_variant;intron_variant	protein_coding;pseudogene	ANN=G|intron_variant|MODIFIER|DPYD|DPYD|transcript|NM_000110.3|protein_coding|19/22|c.2443-1888T>C||||||,G|intron_variant|MODIFIER|DPYD-AS1|DPYD-AS1|transcript|NR_046590.1|pseudogene|1/4|n.65-70278A>G||||||
chr12_117704119_C_T	1.21366	-2.03536	-0.781224	3	50	48	69.1044	65.1607	71.1607	0.0476786	16	5	28	2	0.787716	NOS1;NOS1;NOS1;NOS1	intron_variant;intron_variant;intron_variant;intron_variant	protein_coding;protein_coding;protein_coding;protein_coding	ANN=T|intron_variant|MODIFIER|NOS1|NOS1|transcript|NM_001204218.1|protein_coding|11/29|c.1942-804G>A||||||,T|intron_variant|MODIFIER|NOS1|NOS1|transcript|NM_001204213.1|protein_coding|10/27|c.934-804G>A||||||,T|intron_variant|MODIFIER|NOS1|NOS1|transcript|NM_001204214.1|protein_coding|10/27|c.934-804G>A||||||,T|intron_variant|MODIFIER|NOS1|NOS1|transcript|NM_000620.4|protein_coding|11/28|c.1942-8…
chr2_38299515_C_T	1.21366	-2.03536	-0.781224	3	50	48	69.1044	65.1607	71.1607	0.0476786	16	5	28	2	0.787716	CYP1B1	intron_variant	protein_coding	ANN=T|intron_variant|MODIFIER|CYP1B1|CYP1B1|transcript|NM_000104.3|protein_coding|2/2|c.1044-1062G>A||||||
chr1_97638847_T_C	0.916842	-2.21779	-0.481655	3	50	48	69.1044	65.1829	71.1829	0.0483133	17	4	29	1	0.787716	DPYD;DPYD-AS1	intron_variant;intron_variant	protein_coding;pseudogene	ANN=C|intron_variant|MODIFIER|DPYD|DPYD|transcript|NM_000110.3|protein_coding|20/22|c.2622+19778A>G||||||,C|intron_variant|MODIFIER|DPYD-AS1|DPYD-AS1|transcript|NR_046590.1|pseudogene|1/4|n.64+77305T>C||||||
chr1_97640009_CG_C	0.916842	-2.21779	-0.481655	3	50	48	69.1044	65.1829	71.1829	0.0483133	17	4	29	1	0.787716	DPYD;DPYD-AS1	intron_variant;intron_variant	protein_coding;pseudogene	ANN=C|intron_variant|MODIFIER|DPYD|DPYD|transcript|NM_000110.3|protein_coding|20/22|c.2622+18615delC||||||,C|intron_variant|MODIFIER|DPYD-AS1|DPYD-AS1|transcript|NR_046590.1|pseudogene|1/4|n.64+78469delG||||||INFO_REALIGN_3_PRIME
chr1_97650095_C_T	0.916842	-2.21779	-0.481655	3	50	48	69.1044	65.1829	71.1829	0.0483133	17	4	29	1	0.787716	DPYD;DPYD-AS1	intron_variant;intron_variant	protein_coding;pseudogene	ANN=T|intron_variant|MODIFIER|DPYD|DPYD|transcript|NM_000110.3|protein_coding|20/22|c.2622+8530G>A||||||,T|intron_variant|MODIFIER|DPYD-AS1|DPYD-AS1|transcript|NR_046590.1|pseudogene|1/4|n.65-80875C>T||||||
chr1_97691464_G_C	0.916842	-2.21779	-0.481655	3	50	48	69.1044	65.1829	71.1829	0.0483133	17	4	29	1	0.787716	DPYD;DPYD-AS1	intron_variant;intron_variant	protein_coding;pseudogene	ANN=C|intron_variant|MODIFIER|DPYD|DPYD|transcript|NM_000110.3|protein_coding|19/22|c.2442+8944C>G||||||,C|intron_variant|MODIFIER|DPYD-AS1|DPYD-AS1|transcript|NR_046590.1|pseudogene|1/4|n.65-39506G>C||||||
chr1_97708492_T_C	0.916842	-2.21779	-0.481655	3	50	48	69.1044	65.1829	71.1829	0.0483133	17	4	29	1	0.787716	DPYD;DPYD-AS1	intron_variant;intron_variant	protein_coding;pseudogene	ANN=C|intron_variant|MODIFIER|DPYD|DPYD|transcript|NM_000110.3|protein_coding|18/22|c.2300-7942A>G||||||,C|intron_variant|MODIFIER|DPYD-AS1|DPYD-AS1|transcript|NR_046590.1|pseudogene|1/4|n.65-22478T>C||||||
chr1_97715643_T_C	0.916842	-2.21779	-0.481655	3	50	48	69.1044	65.1829	71.1829	0.0483133	17	4	29	1	0.787716	DPYD;DPYD-AS1	intron_variant;intron_variant	protein_coding;pseudogene	ANN=C|intron_variant|MODIFIER|DPYD|DPYD|transcript|NM_000110.3|protein_coding|18/22|c.2300-15093A>G||||||,C|intron_variant|MODIFIER|DPYD-AS1|DPYD-AS1|transcript|NR_046590.1|pseudogene|1/4|n.65-15327T>C||||||
chr10_96522989_A_T	0.916842	-2.21779	-0.481655	3	50	48	69.1044	65.1829	71.1829	0.0483133	17	4	29	1	0.787716	CYP2C19	intron_variant	protein_coding	ANN=T|intron_variant|MODIFIER|CYP2C19|CYP2C19|transcript|NM_000769.2|protein_coding|1/8|c.168+359A>T||||||
chr12_105068863_A_G	0.916842	-2.21779	-0.481655	3	50	48	69.1044	65.1829	71.1829	0.0483133	17	4	29	1	0.787716	CHST11;CHST11	intron_variant;intron_variant	protein_coding;protein_coding	ANN=G|intron_variant|MODIFIER|CHST11|CHST11|transcript|NM_018413.5|protein_coding|2/2|c.204+73094A>G||||||,G|intron_variant|MODIFIER|CHST11|CHST11|transcript|NM_001173982.1|protein_coding|2/2|c.189+73094A>G||||||
chr15_85445744_G_C	0.916842	-2.21779	-0.481655	3	50	48	69.1044	65.1829	71.1829	0.0483133	17	4	29	1	0.787716	SLC28A1;SLC28A1;SLC28A1	intron_variant;intron_variant;intron_variant	protein_coding;protein_coding;protein_coding	ANN=C|intron_variant|MODIFIER|SLC28A1|SLC28A1|transcript|NM_001287762.1|protein_coding|5/17|c.462-1584G>C||||||,C|intron_variant|MODIFIER|SLC28A1|SLC28A1|transcript|NM_001287761.1|protein_coding|5/14|c.462-1584G>C||||||,C|intron_variant|MODIFIER|SLC28A1|SLC28A1|transcript|NM_004213.4|protein_coding|6/18|c.462-1584G>C||||||
chr17_9672158_T_C	0.916842	-2.21779	-0.481655	3	50	48	69.1044	65.1829	71.1829	0.0483133	17	4	29	1	0.787716	DHRS7C;DHRS7C;USP43-DHRS7C	downstream_gene_variant;downstream_gene_variant;intergenic_region	protein_coding;protein_coding;	ANN=C|downstream_gene_variant|MODIFIER|DHRS7C|DHRS7C|transcript|NM_001220493.1|protein_coding||c.*2647A>G|||||2593|,C|downstream_gene_variant|MODIFIER|DHRS7C|DHRS7C|transcript|NM_001105571.2|protein_coding||c.*2647A>G|||||2593|,C|intergenic_region|MODIFIER|USP43-DHRS7C|USP43-DHRS7C|intergenic_region|USP43-DHRS7C|||n.9672158T>C||||||
chr19_41521729_A_G	0.916842	-2.21779	-0.481655	3	50	48	69.1044	65.1829	71.1829	0.0483133	17	4	29	1	0.787716	CYP2B6	intron_variant	protein_coding	ANN=G|intron_variant|MODIFIER|CYP2B6|CYP2B6|transcript|NM_000767.4|protein_coding|8/8|c.1295-822A>G||||||
chr19_41521730_G_A	0.916842	-2.21779	-0.481655	3	50	48	69.1044	65.1829	71.1829	0.0483133	17	4	29	1	0.787716	CYP2B6	intron_variant	protein_coding	ANN=A|intron_variant|MODIFIER|CYP2B6|CYP2B6|transcript|NM_000767.4|protein_coding|8/8|c.1295-821G>A||||||
chr12_117677516_CT_C,CTT	0.916842	-2.21779	-0.481655	3	50	48	69.1044	65.1829	71.1829	0.0483133	17	4	29	1	0.787716	NOS1;NOS1;NOS1;NOS1;NOS1;NOS1;NOS1;NOS1	intron_variant;intron_variant;intron_variant;intron_variant;intron_variant;intron_variant;intron_variant;intron_variant	protein_coding;protein_coding;protein_coding;protein_coding;protein_coding;protein_coding;protein_coding;protein_coding	ANN=C|intron_variant|MODIFIER|NOS1|NOS1|transcript|NM_001204218.1|protein_coding|21/29|c.3143+2915delA||||||,CTT|intron_variant|MODIFIER|NOS1|NOS1|transcript|NM_001204218.1|protein_coding|21/29|c.3143+2914dupA||||||,C|intron_variant|MODIFIER|NOS1|NOS1|transcript|NM_001204213.1|protein_coding|19/27|c.2033+2915delA||||||,CTT|intron_variant|MODIFIER|NOS1|NOS1|transcript|NM_001204213.1|protein_coding…
chr8_67350920_G_C	0.916842	-2.21779	-0.481655	3	50	48	69.1044	65.1829	71.1829	0.0483133	17	4	29	1	0.787716	ADHFE1	intron_variant	protein_coding	ANN=C|intron_variant|MODIFIER|ADHFE1|ADHFE1|transcript|NM_144650.2|protein_coding|1/13|c.60-1477G>C||||||
chr14_24765684_G_A	0.660628	-1.2731	0.627511	3	50	48	69.1044	65.1999	71.1999	0.0488035	6	15	16	14	0.792836	NOP9;NOP9;DHRS1;DHRS1	upstream_gene_variant;upstream_gene_variant;intron_variant;intron_variant	protein_coding;protein_coding;protein_coding;protein_coding	ANN=A|upstream_gene_variant|MODIFIER|NOP9|NOP9|transcript|NM_174913.2|protein_coding||c.-3477G>A|||||3376|,A|upstream_gene_variant|MODIFIER|NOP9|NOP9|transcript|NM_001286367.1|protein_coding||c.-3477G>A|||||3376|,A|intron_variant|MODIFIER|DHRS1|DHRS1|transcript|NM_001136050.2|protein_coding|4/8|c.374+31C>T||||||,A|intron_variant|MODIFIER|DHRS1|DHRS1|transcript|NM_138452.2|protein_coding|4/8|c.374…
chr13_95716514_G_A,GTA,*	-16.5661	17.2592	16.9491	3	50	48	69.1044	65.2369	71.2369	0.0498919	17	4	22	8	0.798981	ABCC4;ABCC4;ABCC4;ABCC4	intron_variant;intron_variant;intron_variant;intron_variant	protein_coding;protein_coding;protein_coding;protein_coding	ANN=A|intron_variant|MODIFIER|ABCC4|ABCC4|transcript|NM_005845.4|protein_coding|25/30|c.3211-1401C>T||||||,GTA|intron_variant|MODIFIER|ABCC4|ABCC4|transcript|NM_005845.4|protein_coding|25/30|c.3211-1403_3211-1402dupTA||||||,A|intron_variant|MODIFIER|ABCC4|ABCC4|transcript|NM_001301829.1|protein_coding|24/29|c.3070-1401C>T||||||,GTA|intron_variant|MODIFIER|ABCC4|ABCC4|transcript|NM_001301829.1|pro…
chr4_69695818_G_A	-16.5661	17.2592	16.9491	3	50	48	69.1044	65.2369	71.2369	0.0498919	17	4	22	8	0.798981	UGT2B10;UGT2B10;UGT2B10	intron_variant;intron_variant;intron_variant	protein_coding;protein_coding;protein_coding	ANN=A|intron_variant|MODIFIER|UGT2B10|UGT2B10|transcript|NM_001075.5|protein_coding|5/5|c.1308-500G>A||||||,A|intron_variant|MODIFIER|UGT2B10|UGT2B10|transcript|NM_001144767.2|protein_coding|5/5|c.1056-500G>A||||||,A|intron_variant|MODIFIER|UGT2B10|UGT2B10|transcript|NM_001290091.1|protein_coding|5/5|c.564-500G>A||||||
chr6_32804284_G_A	-16.5661	17.2592	16.9491	3	50	48	69.1044	65.2369	71.2369	0.0498919	17	4	22	8	0.798981	PSMB8;PSMB8;TAP2;TAP2;TAP2	downstream_gene_variant;downstream_gene_variant;intron_variant;intron_variant;intron_variant	protein_coding;protein_coding;protein_coding;protein_coding;protein_coding	ANN=A|downstream_gene_variant|MODIFIER|PSMB8|PSMB8.3|transcript|NM_148919.3|protein_coding||c.*4452C>T|||||4210|,A|downstream_gene_variant|MODIFIER|PSMB8|PSMB8.3|transcript|NM_004159.4.6|protein_coding||c.*4452C>T|||||4210|,A|intron_variant|MODIFIER|TAP2|TAP2.2|transcript|NM_000544.3.8|protein_coding|3/11|c.609-734C>T||||||,A|intron_variant|MODIFIER|TAP2|TAP2.2|transcript|NM_018833.2.2|protein_co…
chr6_32804299_C_T	-16.5661	17.2592	16.9491	3	50	48	69.1044	65.2369	71.2369	0.0498919	17	4	22	8	0.798981	PSMB8;PSMB8;TAP2;TAP2;TAP2	downstream_gene_variant;downstream_gene_variant;intron_variant;intron_variant;intron_variant	protein_coding;protein_coding;protein_coding;protein_coding;protein_coding	ANN=T|downstream_gene_variant|MODIFIER|PSMB8|PSMB8.3|transcript|NM_148919.3|protein_coding||c.*4437G>A|||||4195|,T|downstream_gene_variant|MODIFIER|PSMB8|PSMB8.3|transcript|NM_004159.4.6|protein_coding||c.*4437G>A|||||4195|,T|intron_variant|MODIFIER|TAP2|TAP2.2|transcript|NM_000544.3.8|protein_coding|3/11|c.609-749G>A||||||,T|intron_variant|MODIFIER|TAP2|TAP2.2|transcript|NM_018833.2.2|protein_co…
